**Long title: Human demographic history has amplified the effects background selection across the genome**

**Short title: Background selection and demography in humans**

Raul Torres<sup>1</sup>, Zachary A. Szpiech<sup>2</sup>, and Ryan D. Hernandez<sup>2,3,4,5\*</sup>

<sup>1</sup> Biomedical Sciences Graduate Program, University of California San Francisco, San Francisco, CA, United States of America

<sup>2</sup> Department of Bioengineering and Therapeutic Sciences, University of California San Francisco, San Francisco, CA, United States of America

<sup>3</sup> Institute for Human Genetics, University of California San Francisco, San Francisco, CA, United States of America

<sup>4</sup> Institute for Computational Health Sciences, University of California San Francisco, San Francisco, CA, United States of America

<sup>5</sup> Quantitative Biosciences Institute, University of California San Francisco, San Francisco, CA, United States of America

\* Corresponding author

E-mail: [ryan.hernandez@ucsf.edu](mailto:ryan.hernandez@ucsf.edu) (RDH)

## 1 **Abstract**

2           Natural populations often grow, shrink, and migrate over time. Demographic pro-  
3 cesses such as these can impact genome-wide levels of genetic diversity. In addition,  
4 genetic variation in functional regions of the genome can be altered by natural selection,  
5 which drives adaptive mutations to higher frequency or purges deleterious ones. Such  
6 selective processes impact not only the sites directly under selection but also nearby  
7 neutral variation through genetic linkage. While there is extensive literature examining  
8 the impact of linked selection (i.e., genetic hitchhiking in the context of positive selection  
9 and background selection in the context of deleterious variants) at demographic equilib-  
10 rium, less is known about how non-equilibrium demographic processes impact patterns  
11 of linked selection. Utilizing a global sample of human whole-genome sequences from  
12 the Thousand Genomes Project and extensive simulations, we investigate how non-  
13 equilibrium demographic processes magnify and dampen the consequences of back-  
14 ground selection (BGS) across the human genome. We observe that, compared to Afri-  
15 cans, non-African populations have experienced larger proportional decreases in neu-  
16 tral genetic diversity in regions of strong BGS. We replicate these findings in admixed  
17 populations by showing that non-African ancestral components of the genome have  
18 been impacted more severely in regions of strong BGS. We attribute these differences  
19 to the strong population bottlenecks that non-Africans experienced as they migrated out  
20 of Africa and throughout the globe. Furthermore, we observe a strong correlation be-  
21 tween  $F_{ST}$  and BGS, suggesting a stronger rate of genetic drift in regions of strong BGS.  
22 Forward simulations of human demographic history and BGS support these observa-  
23 tions. Our results show that non-equilibrium demography significantly alters the conse-

24 quences of BGS and support the need for more work investigating the dynamic process  
25 of multiple evolutionary forces operating in concert.

26

## 27 **Author summary**

28       Patterns of genetic diversity within a species are impacted at broad and fine  
29 scales by population size changes (“demography”) and natural selection. From both  
30 population genetics theory and observation of genomic sequence data, it is known that  
31 population size changes can impact genome-wide average neutral genetic diversity.  
32 Additionally, natural selection can impact neutral genetic diversity regionally across the  
33 genome through the process of linked selection. During this process, natural selection  
34 acting on adaptive or deleterious variants in the genome will also impact diversity at  
35 linked neutral sites. However, less is known about the dynamic changes to diversity that  
36 occur in regions impacted by linked selection when a population undergoes a size  
37 change. We characterize these dynamic changes using human sequence data, focusing  
38 on regions of the genome experiencing linked selection that is caused by deleterious  
39 variation (called “background selection”). We find that the population size changes ex-  
40 perience by humans have shaped the consequences of linked selection in the human  
41 genome. In particular, population contractions, such as those experienced by non-  
42 Africans, have disproportionately decreased neutral diversity in regions of the genome  
43 experiencing strong BGS, resulting in large differences between African and non-African  
44 populations.

45

46

## 47 **Introduction**

48           Genetic diversity in a species is determined through the complex interplay of mu-  
49 tation, demography, genetic drift, and natural selection. These evolutionary forces oper-  
50 ate in concert to shape patterns of diversity at both the local scale and genome-wide  
51 scale. For example, in recombining species, levels of genetic diversity are distributed  
52 heterogeneously across the genome as peaks and valleys that are often correlated with  
53 recombination rate and generated by past or ongoing events of natural selection [1].  
54 But at the genome-wide scale, average levels of genetic diversity are primarily impacted  
55 by population size changes, yielding signatures of diversity that are a function of a  
56 population's demographic history [2]. These patterns of diversity may also yield infor-  
57 mation for inferring past events of natural selection and population history, giving valua-  
58 ble insight into how populations have evolved over time [3–8]. With recent advance-  
59 ments in sequencing technology yielding whole-genome data from thousands of individ-  
60 uals from species with complex evolutionary histories [9,10], formal inquiry into the in-  
61 terplay of demography and natural selection and testing of whether demographic effects  
62 act uniformly across the genome as a function of natural selection is now possible.

63           In the past decade, population genetic studies have shed light on the pervasive-  
64 ness of dynamic population histories in shaping overall levels of genetic diversity across  
65 different biological species. For example, multiple populations have experienced major  
66 population bottlenecks that have resulted in decreased levels of genome-wide diversity.  
67 Evidence for population bottlenecks exists in domesticated species such as cattle [11],  
68 dogs [12], and rice [13], and in natural populations such as *Drosophila melanogaster*  
69 [14–16], rhesus macaque [17], and humans [18,19]. Notably, population bottlenecks



70 leave inordinately long lasting signatures of decreased diversity, which may be de-  
71 pressed long after a population has recovered to its ancestral size [20].

72         Locally (i.e., regionally) across the genome, the action of natural selection can  
73 also lead to distinct signatures of decreased genetic diversity (although some forms of  
74 selection, such as balancing selection, can increase genetic diversity [21]). For exam-  
75 ple, mutations with functional effects may be removed from the population due to purify-  
76 ing selection or fix due to positive selection, thereby resulting in the elimination of genet-  
77 ic diversity at the site. But while sites under direct natural selection in the genome rep-  
78 resent only a small fraction of all sites genome-wide, the action of natural selection on  
79 these selected sites can have far-reaching effects across neutral sites in the genome  
80 due to linkage. Under positive selection, genetic hitchhiking [22] causes variants lying  
81 on the same haplotype as the selected allele to rise to high frequency during the selec-  
82 tion process. Conversely, under purifying selection, background selection [23] causes  
83 linked neutral variants to decrease in frequency or to be removed from the population.  
84 Both of these processes of linked selection result in decreased neutral genetic diversity  
85 around the selected site. Recombination can decouple neutral sites from selected sites  
86 in both cases and neutral diversity tends to increase toward its neutral expectation as  
87 genetic distance from selected sites increases [24].

88         Evidence for genetic hitchhiking and background selection has been obtained  
89 from the genomes of several species, including *Drosophila melanogaster* [25–30], wild  
90 and domesticated rice [31,32], nematode [33,34], humans [3,6,35–39], and others (see  
91 [1] for a review). While the relative contributions of genetic hitchhiking and background  
92 selection to shaping patterns of human genomic diversity have been actively debated

93 [37,40–42], the data strongly support a large role for background selection in shaping  
94 genome-wide patterns of neutral genetic variation [38,39]. Indeed, recent arguments  
95 have been made in favor of background selection being treated as the null model when  
96 investigating the impact of linked selection across recombining genomes [1,29,42–44].  
97 To build on this movement, our investigation will focus on aspects of background selec-  
98 tion (BGS) in humans.

99         The impact of BGS has been quantified across the human genome [6], which  
100 suggests that neutral genetic diversity in the human autosomes has been reduced 19-  
101 26% because of BGS. However, it is not obvious whether populations that have experi-  
102 enced different demographic histories, such as African and non-African humans, should  
103 exhibit similar effects in regions of BGS. Early work resulted in the expression  $\pi \approx$   
104  $4f_0N_e\mu$  [23], which suggests that the expected level of diversity with background selec-  
105 tion would be proportional to the neutral expectation (with proportionality constant  $f_0$  be-  
106 ing a function of the rates of deleterious mutation and recombination). While demo-  
107 graphic forces will impact  $N_e$ , this classic model implies that the relative reduction in di-  
108 versity due to BGS may be insensitive to different demographic histories. Recent work  
109 has demonstrated that this assumption may hold if selection is strong enough (or popu-  
110 lations are large enough) such that mutation-selection balance is maintained [45,46].  
111 However, humans and several other natural populations likely do not meet such criteria,  
112 and are rarely at demographic equilibrium. Therefore, other evolutionary forces, such as  
113 genetic drift, may perturb genetic diversity in regions of BGS that are unaccounted for in  
114 these models.

115           While little is known about the impact of demography on BGS' effects, recent  
116 studies have suggested that alleles directly under natural selection experience non-  
117 linear dynamics in the context of non-equilibrium demography. In general, the equilibri-  
118 um frequency of an allele is dependent on its fitness effect, with deleterious alleles hav-  
119 ing lower equilibrium frequencies than neutral alleles. After a population size change,  
120 deleterious alleles tend to change frequency faster than neutral alleles, allowing them to  
121 reach their new equilibrium frequency at a faster rate [47,48]. This can result in relative  
122 differences in deleterious allele frequencies when comparing populations with different  
123 demographic histories. Such effects are especially apparent in populations suffering  
124 bottlenecks [49] and have been tested and observed between different human popula-  
125 tions [50–52]. We hypothesized that these non-equilibrium dynamics could also amplify  
126 the effects of background selection, with classic models being poorly suited to describe  
127 such impacts in non-equilibrium populations. In the case of population bottlenecks, re-  
128 gions under BGS may respond more rapidly than neutral regions to such demographic  
129 events, if the rate of removal of genetic diversity in regions under BGS is also higher.

130           To investigate the impact of non-equilibrium dynamics in regions of BGS, we  
131 measure patterns of average pairwise neutral genetic diversity ( $\pi$ ), or neutral heterozy-  
132 gosity if the population was admixed, as a function of the strength of BGS within a glob-  
133 al set of human populations from phase 3 of the Thousand Genomes Project (TGP) [9].  
134 We focus particularly on the ratio of neutral diversity in regions of strong BGS to regions  
135 of weak BGS, which we term “relative diversity.” We also investigate how genetic differ-  
136 entiation between TGP populations (as measured by  $F_{ST}$ ) is shaped by BGS strength.  
137 We find substantial differences in relative diversity between populations, which we at-

138 tribute to their non-equilibrium demographics. We confirm that the interplay of demogra-  
139 phy and BGS can explain the differences of relative diversity across human populations  
140 with simulations incorporating a parametric demographic model of human history [7]  
141 with and without a model of BGS. Specifically, our simulations of non-African human  
142 demography show that the out-of-Africa population bottleneck and European-Asian split  
143 population bottleneck each coincide with a distinct drop in relative diversity. Further-  
144 more, we demonstrate that back migration from Europeans and Asians into Africa re-  
145 introduces sufficient deleterious variation to impact BGS strength, leading to decreased  
146 relative diversity in Africans. These results demonstrate the strong impact that changing  
147 demography has on perturbing levels of diversity in regions under BGS and have impli-  
148 cations for population genetic studies seeking to characterize linked selection across  
149 any species or population that is not at demographic equilibrium.

150

## 151 **Results**

### 152 **Differential impact of BGS across human populations**

153 We measured mean pairwise genetic diversity ( $\pi$ ) among the 20 non-admixed  
154 populations from the phase 3 TGP data set, consisting of 5 populations each from 4  
155 continental groups: Africa (AFR), Europe (EUR), South Asia (SASN), and East Asia  
156 (EASN) (Table S11 in Supporting information for population labels and grouping). After  
157 a set of stringent filters were applied to all 20 populations to identify a high-quality set of  
158 putatively neutral sites in the genome (see Materials and Methods), sites were divided  
159 into quantile bins based on their BGS coefficient (termed “ $B$ ”), which represents the in-  
160 ferred strength of BGS from McVicker et al. [6] (see Materials and Methods). For our

161 initial set of analyses, we focused on the bins corresponding to the 1% of sites under  
162 strongest BGS (or lowest  $B$ ) and the 1% of sites under weakest BGS (or highest  $B$ ).  
163 Mean diversity (normalized by divergence with rhesus macaque) within these bins for  
164 each population is shown in Figs 1A-B. As expected, normalized diversity was highest  
165 in African populations and lowest in East Asian populations across both 1%  $B$  quantile  
166 bins.

167 To obtain estimates of the reduction in diversity in regions of strong BGS for each  
168 population, we calculated a statistic called “relative diversity” (analogous to  $\pi/\pi_0$  in the  
169 BGS literature; [23,53]), which we defined as the ratio of normalized diversity in the  
170 strongest 1% BGS bin to normalized diversity in the weakest 1% BGS bin. Fig 1C  
171 shows that relative diversity was lower in non-African populations (0.348-0.365 for non-  
172 Africans, 0.396-0.408 for Africans), suggesting higher rates of genetic diversity reduc-  
173 tion in strong BGS regions in non-African populations compared to African populations.  
174 Furthermore, the greatest reduction was observed among East Asian populations (CDX,  
175 JPT, and CHS populations).

176 To characterize these effects across a broader distribution of BGS strengths, we  
177 grouped populations together according to their continental group (i.e., African, Europe-  
178 an, South Asian, and East Asian, see Table S11 in Supporting information for a detailed  
179 description) and estimated relative diversity at neutral sites for each of the continental  
180 groups in bins corresponding to the bottom 1%, 5%, 10%, and 25% quantiles of  $B$  (note  
181 these partitions were not disjoint). As expected, relative diversity increased for all conti-  
182 nental groups as the bins became more inclusive (Fig 2B), reflecting a reduced impact  
183 on the reduction of diversity due to BGS. We also observed that non-African continental

184 groups consistently had a lower relative diversity compared to African groups, demon-  
185 strating that the patterns we observed in the most extreme BGS regions also held for  
186 weaker BGS regions. Interestingly, we observed a consistent trend of rank order for rel-  
187 ative diversity between the different continental groups for each quantile bin, with the  
188 East Asian group experiencing the greatest reduction of relative diversity, followed by  
189 the South Asian, European, and African groups. This result suggested a stronger effect  
190 for demography on the diversity-reducing effect of BGS for those populations experienc-  
191 ing the strongest bottlenecks. However, the observed differences in relative diversity  
192 between non-African and African continental groups became less pronounced as the  
193 bins became more inclusive (Fig 2B). These effects remained even after we controlled  
194 for the effects of GC-biased gene conversion and recombination hotspots (Figs S2 and  
195 S4) or if we did not normalize diversity by divergence (Figs S3 and S5).

196

### 197 **Recent admixture has not altered the impact of BGS**

198 We then investigated whether the effects of BGS have remained consistent  
199 across human populations that have experienced recent admixture. To do so, we tested  
200 for the effect of BGS on normalized and relative diversity in the 6 admixed TGP popula-  
201 tions (ASW, ACB, CLM, MXL, PEL, and PUR). We first used the local ancestry tracks  
202 inferred by the phase 3 TGP consortium to divide up admixed samples into genomic  
203 segments that are homozygous for a specific local ancestry (i.e., African, European, or  
204 Native American). These segments were then collated across all admixed samples (see  
205 Materials and Methods), irrespective of their source population. We then calculated  
206 normalized and relative heterozygosity across the collated segments as a function of

207 the BGS quantile bins described in the previous section. For comparison, heterozygosi-  
208 ty was also calculated for each TGP continental group. Across all BGS quantile bins,  
209 normalized diversity (heterozygosity/divergence) in African and European ancestry  
210 segments closely matched the values observed in their non-admixed counterparts (Fig  
211 3A). However, normalized diversity was significantly lower in the Native American an-  
212 cestry segments of admixed individuals than in the East Asian continental group (Fig  
213 3A). This was expected given the more recent divergence of Native American popula-  
214 tions and the strong population bottleneck they experienced migrating into the Americas  
215 [18,54,55].

216 Patterns of relative diversity for each of the ancestries also largely recapitulated  
217 the patterns observed in their continental group counterparts across all BGS quantile  
218 bins, with the largest reductions in relative diversity occurring for the Native American  
219 and European ancestral segments (Fig 3B). These patterns were similar to the broader  
220 analyses of the 20 non-admixed populations described above, with a consistent rank  
221 order of decreasing relative diversity observed for African, European, and Native Ameri-  
222 can ancestral segments. However, for the strongest 1% BGS quantile bin, relative di-  
223 versity in Native American ancestry segments was observed to be greater than for the  
224 European continental group or European local ancestry segments, which was incon-  
225 sistent with the other BGS quantile bins.

226

## 227 **BGS has shaped patterns of population differentiation**

228 To test if greater genetic drift in regions of strong BGS has contributed to the ob-  
229 served greater losses of relative diversity in non-African populations and to understand

230 how BGS has impacted local patterns of population differentiation, we measured  $F_{ST}$  as  
231 a function of  $B$ . It has been shown that estimates of  $F_{ST}$  are affected by SNP ascertain-  
232 ment as well as the choice of computation method [56]. To limit such biases, we followed  
233 the procedures recommended by Bhatia et al. [56] (see Materials and Methods) and on-  
234 ly analyzed SNPs that were polymorphic in an outgroup human population (the Khoe-  
235 San). After filtering, a total of 3,497,105 sites were left for estimating  $F_{ST}$ . Sites were di-  
236 vided into 2% quantile bins based on the genome-wide distribution of  $B$ , and  $F_{ST}$  was  
237 calculated within each bin for all population pairs in which both populations were from  
238 different continental groups (150 total pairwise comparisons). We performed simple lin-  
239 ear regression using  $B$  as an explanatory variable and  $F_{ST}$  as our dependent variable  
240 with the linear model  $F_{ST} = \beta_0 + \beta_1 B + \varepsilon$ . We found that  $B$  was significantly associated  
241 with an increase in local  $F_{ST}$  across the genome (Fig 4A, Table 1). When considering all  
242 150 population comparisons (referred to as the “Global” estimate in Table 1),  $B$  ex-  
243 plained 26.9% of the change in  $F_{ST}$  across the most extreme  $B$  values (i.e., when com-  
244 paring weak BGS [ $B = 1$ ] to the strong BGS [ $B = 0$ ]). To test if the linear model was bi-  
245 ased by outliers or bins with high influence, we also performed robust linear regression  
246 but still observed a significant contribution of  $B$  to  $F_{ST}$ , with a 28.3% change between the  
247 highest and lowest  $B$  value (Table S6 in Supporting information).

248  
249  
250  
251  
252  
253  
254  
255  
256



257 **Table 1. Regression coefficient estimates for linear regression of  $F_{ST}$  on 2% quan-**  
 258 **tile bins of  $B$ .**

|                                               | <b>AFR vs.<br/>EASN</b>              | <b>AFR vs.<br/>EUR</b>               | <b>AFR vs.<br/>SASN</b>              | <b>EUR vs.<br/>SASN</b>              | <b>EUR vs.<br/>EASN</b>              | <b>SASN<br/>vs.<br/>EASN</b>         | <b>Global</b>                        |
|-----------------------------------------------|--------------------------------------|--------------------------------------|--------------------------------------|--------------------------------------|--------------------------------------|--------------------------------------|--------------------------------------|
| $\beta_0$<br><b>± SEM</b><br><b>(p-value)</b> | 0.2044<br>± 0.0039<br>( $< 1e-04$ )  | 0.1716<br>± 0.0031<br>( $< 1e-04$ )  | 0.1596<br>± 0.0029<br>( $< 1e-04$ )  | 0.0455<br>± 0.0011<br>( $< 1e-04$ )  | 0.1216<br>± 0.0029<br>( $< 1e-04$ )  | 0.0903<br>± 0.0023<br>( $< 1e-04$ )  | 0.1322<br>± 0.0019<br>( $< 1e-04$ )  |
| $\beta_1$<br><b>± SEM</b><br><b>(p-value)</b> | -0.0434<br>± 0.0046<br>( $< 1e-04$ ) | -0.0358<br>± 0.0037<br>( $< 1e-04$ ) | -0.0355<br>± 0.0034<br>( $< 1e-04$ ) | -0.0098<br>± 0.0013<br>( $< 1e-04$ ) | -0.0173<br>± 0.0035<br>( $< 1e-04$ ) | -0.0261<br>± 0.0027<br>( $< 1e-04$ ) | -0.0280<br>± 0.0022<br>( $< 1e-04$ ) |
| $r$<br><b>± SEM</b>                           | -0.8363<br>± 0.0295                  | -0.7441<br>± 0.0362                  | -0.7794<br>± 0.0332                  | -0.3847<br>± 0.0414                  | -0.6220<br>± 0.0785                  | -0.5968<br>± 0.0348                  | -0.1292<br>± 0.0098                  |

259  
 260 The first two rows give the regression coefficients for the linear model  $F_{ST} = \beta_0 + \beta_1 B +$   
 261  $\epsilon$ , where  $B$  represents the mean background selection coefficient for the bin being test-  
 262 ed and  $F_{ST}$  is the estimated  $F_{ST}$  for all population comparisons within a particular pair of  
 263 continental groups (given in the column header). The final column, “Global”, gives the  
 264 regression coefficients for the linear model applied to all pairwise population compari-  
 265 sons (150 total). The correlation coefficient,  $r$ , between  $B$  and  $F_{ST}$  for each comparison  
 266 is shown in the bottom row. Standard errors of the mean (SEM) for  $\beta_0$ ,  $\beta_1$ , and  $r$  were  
 267 calculated from 1,000 bootstrap iterations (see Materials and Methods). P-values are  
 268 derived from a two-sided t-test of the t-value for the corresponding regression coeffi-  
 269 cient.

270  
 271 Earlier studies using SNP array data have shown that  $F_{ST}$  and recombination rate  
 272 are correlated in humans [57]. We could only partially replicate these findings when we  
 273 conducted linear regression of  $F_{ST}$  as a function of recombination rate ( $\rho$ ) (measured in  
 274 2% recombination rate quantile bins) with the linear model  $F_{ST} = \beta_0 + \beta_1 \rho + \epsilon$ . We ob-  
 275 served that recombination rate only significantly predicts a change in  $F_{ST}$  across the ge-  
 276 nome for comparisons between South Asian and East Asian populations (Fig 4B, Table  
 277 2). This result remained unchanged when performing robust linear regression for the  
 278 model (Table S7 in Supporting information).

279  
 280

281 **Table 2. Regression coefficient estimates for linear regression of  $F_{ST}$  on 2% quan-**  
 282 **tile bins of recombination rate.**

|                                               | <b>AFR vs.<br/>EASN</b>             | <b>AFR vs.<br/>EUR</b>              | <b>AFR vs.<br/>SASN</b>             | <b>EUR vs.<br/>SASN</b>             | <b>EUR vs.<br/>EASN</b>             | <b>SASN<br/>vs.<br/>EASN</b>        | <b>Global</b>                       |
|-----------------------------------------------|-------------------------------------|-------------------------------------|-------------------------------------|-------------------------------------|-------------------------------------|-------------------------------------|-------------------------------------|
| $\beta_0$<br><b>± SEM</b><br><b>(p-value)</b> | 0.1688<br>± 0.0007<br>( $< 1e-04$ ) | 0.1422<br>± 0.0006<br>( $< 1e-04$ ) | 0.1305<br>± 0.0006<br>( $< 1e-04$ ) | 0.0373<br>± 0.0002<br>( $< 1e-04$ ) | 0.1070<br>± 0.0006<br>( $< 1e-04$ ) | 0.0688<br>± 0.0004<br>( $< 1e-04$ ) | 0.1091<br>± 0.0003<br>( $< 1e-04$ ) |
| $\beta_1$<br><b>± SEM</b><br><b>(p-value)</b> | -0.0009<br>± 0.0026<br>(0.7073)     | 0.0005<br>± 0.0022<br>(0.8454)      | 0.0005<br>± 0.0021<br>(0.8196)      | -0.0015<br>± 0.0007<br>(0.3906)     | 0.0005<br>± 0.0021<br>(0.7002)      | -0.0050<br>± 0.0014<br>(0.0363)     | -0.0010<br>± 0.0012<br>(0.8842)     |
| $r$<br><b>± SEM</b>                           | -0.0106<br>± 0.0287                 | 0.0055<br>± 0.0257                  | 0.0065<br>± 0.0253                  | -0.0243<br>± 0.0119                 | 0.0109<br>± 0.0379                  | -0.0592<br>± 0.0159                 | -0.0017<br>± 0.0021                 |

283  
 284 The first two rows give the regression coefficients for the linear model  $F_{ST} = \beta_0 + \beta_1\rho + \varepsilon$ ,  
 285 where  $\rho$  represents the mean recombination rate for the bin being tested and  $F_{ST}$  is the  
 286 estimated  $F_{ST}$  for all population comparisons within a particular pair of continental  
 287 groups (given in the column header). The final column, “Global”, gives the regression  
 288 coefficients for the linear model applied to all pairwise population comparisons (150 to-  
 289 tal). When performing the regression,  $\rho$  was first scaled to between 0 and 1, such that 1  
 290 represents the maximum observed recombination rate (126.88 cM/Mb) and 0 repre-  
 291 sents the minimum observed recombination rate (0.0 cM/Mb). The correlation coeffi-  
 292 cient,  $r$ , between  $\rho$  and  $F_{ST}$  for each comparison is shown in the bottom row. Standard  
 293 errors of the mean (SEM) for  $\beta_0$ ,  $\beta_1$ , and  $r$  were calculated from 1,000 bootstrap itera-  
 294 tions (see Materials and Methods). P-values are derived from a two-sided t-test of the t-  
 295 value for the corresponding regression coefficient.

296  
 297 Since the correlation between  $F_{ST}$  and recombination rate was previously docu-  
 298 mented as being strongest in coding regions [57], where the impact of BGS and other  
 299 modes of linked selection is also expected to be strongest, we sought to disentangle the  
 300 roles of BGS and recombination rates as explanatory variables for  $F_{ST}$  by using multiple  
 301 linear regression. This served as a test for any additional effect recombination rate may  
 302 have on  $F_{ST}$  that  $B$  failed to capture. To do so, we first split the genome into 2% recom-  
 303 bination rate quantile bins and further subdivided each of these bins into 4%  $B$  quantile  
 304 bins ( $50 \times 25 = 1,250$  bins total). We then measured  $F_{ST}$  within each bin. We also parti-  
 305 tioned sites in the reverse order (2%  $B$  bins followed by 4% recombination rate bins)

306 and repeated all analyses. Our choice in total number of bins resulted in a minimum of  
307 320 SNPs per bin for estimating  $F_{ST}$  between any two populations, which should be suf-  
308 ficient to avoid errors when estimating  $F_{ST}$  across multiple loci [58]. After performing  
309 multiple linear regression of  $F_{ST}$  on  $B$ , recombination rate ( $\rho$ ), and an interaction term  
310 between the two ( $B\rho$ ) with the linear model  $F_{ST} = \beta_0 + \beta_1 B + \beta_2 \rho + \beta_3 B\rho + \varepsilon$ , we ob-  
311 served that  $B$  was a statistically significant predictor ( $p < 1e-04$ ) for  $F_{ST}$  across all popu-  
312 lation comparisons regardless of how we partitioned sites (Table S8 in Supporting in-  
313 formation). This result remained unchanged when performing robust regression. In con-  
314 trast, recombination rate exhibited sporadic significance as an explanatory variable for  
315  $F_{ST}$  across population comparisons and was dependent upon how sites were partitioned  
316 (i.e., whether we first partitioned by  $B$  or by recombination rate) (Table S8 in Supporting  
317 information). Furthermore, strong differences between the two binning schemes were  
318 observed for the magnitude of the recombination rate regression coefficient for certain  
319 population comparisons (e.g., African vs. East Asian and South Asian vs. East Asian),  
320 while the coefficients for  $B$  were consistent across binning schemes. The direction in  
321 which recombination rate explained  $F_{ST}$  was also inconsistent across different popula-  
322 tion comparisons, with European vs. South Asian and European vs. East Asian compar-  
323 isons showing a significant positive change in  $F_{ST}$  as a function of increasing recombi-  
324 nation rate. This result was contrary to an expectation of decreasing  $F_{ST}$  as a function of  
325 increasing recombination rate [57]. We also failed to observe consistent effects from the  
326 interaction term for  $B$  and recombination rate on  $F_{ST}$  across population comparisons or  
327 binning schemes (Table S8 in Supporting information). Performing robust regression on  
328 the model did not change these results. However, in contrast to recombination rate,

329 when the model was performed utilizing all TGP populations (i.e., the “Global” estimate),  
330 the interaction term was significant in explaining  $F_{ST}$  across both types of binning  
331 schemes.

332 To aid in visualizing the results of our multidimensional linear model, we plotted  
333  $F_{ST}$  for each population comparison as a function of recombination rate (across 4%  
334 quantile bins) while conditioning on  $B$  (Fig 5A). We also plotted points in the reciprocal  
335 direction, with  $F_{ST}$  being plotted as a function of  $B$  while conditioning on recombination  
336 rate (Fig 5B). These data points were derived from the same points used as input for  
337 the multiple linear regression model described above. The results for  $F_{ST}$  between Afri-  
338 can and South Asian populations showed that  $B$  separated different levels of  $F_{ST}$  across  
339 most recombination rate bins (Fig 5A, Table S9 in Supporting information). Furthermore,  
340 regardless of how  $B$  was conditioned on recombination rate, it still exhibited a strong  
341 trend of increasing  $F_{ST}$  as the strength of BGS increased (Fig 5B, Table S10 in Support-  
342 ing information). These patterns were imperfect though, and statistical significance was  
343 not always attained, especially for comparisons between non-African populations (Fig  
344 S6, Table S10 in Supporting information). However, greater separation in  $F_{ST}$  was gener-  
345 ally achieved when conditioning recombination rate on  $B$  and the slope was always  
346 negative when plotting  $F_{ST}$  across  $B$ , regardless of which recombination rate percentile  
347 bin  $B$  was conditioned on. These results suggested that  $B$  is a dominant predictor for  
348  $F_{ST}$ , while recombination rate plays a minor role.

349

## 350 **Demographic inference in putatively neutral regions of the genome**

351 One consequence of BGS driving patterns of neutral variation within and be-

352 tween human populations is that demographic inference could be substantially biased  
353 [59,60]. To assess the degree of bias, we inferred a 13-parameter demographic model  
354 of African, European, and East Asian demography using only putatively neutral regions  
355 of the genome under the weakest effects of BGS ( $B \geq 0.994$ ) from a subset of TGP indi-  
356 viduals with high coverage whole genome sequence data (see Materials and Methods).  
357 Our demographic model followed that of Gutenkunst et al. [7], with an ancient human  
358 expansion in Africa and a single out-of-Africa bottleneck followed by European- and  
359 East Asian-specific bottlenecks, as well as exponential growth in both non-African popu-  
360 lations and migration between all populations. To make comparisons to previous studies  
361 that have used sequence data from coding regions or genes [7,61,62], which may be  
362 under strong BGS, we also inferred demographic parameters using coding four-fold de-  
363 generate synonymous sites. Our inferred parameters for human demography were strik-  
364 ingly different between the two sets of sequence data (Fig S1, Table S1 in Supporting  
365 information). Notably, inferred effective population size parameters were larger for con-  
366 temporary population sizes when using four-fold degenerate synonymous sites versus  
367 weak BGS neutral regions, with  $N_e$  inferred to be 22%, 23%, and 29% larger for AFR,  
368 EUR, and EASN populations, respectively. This is despite the fact that the ancestral  $N_e$   
369 was inferred to be lower for four-fold degenerate synonymous sites ( $N_e = 18,449$  and  
370  $17,118$ , for weak BGS neutral regions and four-fold degenerate sites, respectively). This  
371 result may stem from the expected decrease in  $N_e$  going into the past in regions of  
372 BGS, which can lead to inflated estimates of recent population growth [60] and has also  
373 been shown in simulation studies of synonymous sites under BGS [59].  
374

## 375 **Simulations confirm that demographic effects can impact background selection**

376 Using the demographic parameters inferred from weak BGS neutral regions, we  
377 simulated the joint effects of demography and BGS on neutral diversity for African, Eu-  
378 ropean, and East Asian populations (see Materials and Methods). We also ran an iden-  
379 tical set of simulations without BGS in order to generate an expectation of the effect of  
380 demography only on neutral diversity. To measure the relative impact of BGS for each  
381 population, we then took the ratio of neutral diversity from BGS simulations ( $\pi$ ) and neu-  
382 tral diversity from simulations without BGS ( $\pi_0$ ) to calculate relative diversity ( $\pi/\pi_0$ ). As  
383 expected, we found that BGS reduced relative diversity ( $\pi/\pi_0 < 1$ ) for all three popula-  
384 tions in our simulations. However, non-African populations experienced a proportionally  
385 larger decrease in  $\pi/\pi_0$  compared to the African population ( $\pi/\pi_0 = 0.43, 0.42, 0.41$  in  
386 AFR, EUR, and EASN respectively). To understand how this dynamic process occurs,  
387 we sampled all simulated populations every 100 generations through time to observe  
388 the effect of population size change on  $\pi/\pi_0$  (Fig 6). We observed that there is a distinct  
389 drop in  $\pi/\pi_0$  at each population bottleneck experienced by non-Africans, with East  
390 Asians suffering the largest drop overall, followed by Europeans. Interestingly, Africans  
391 also experienced a large drop in  $\pi/\pi_0$  (but less than non-Africans) even though they did  
392 not experience any bottlenecks. This was attributable to migration between non-Africans  
393 and Africans and this pattern disappeared when we ran simulations using an identical  
394 demographic model with BGS but without migration between populations (Fig S7). This  
395 finding highlights an evolutionary role that deleterious alleles can play when they are  
396 transferred across populations through migration (see Discussion).

397 Our simulations were based on the functional density found in the region of the

398 human genome with the strongest effect of BGS (chr3: 48,600,000-50,600,000), where  
399 20.46% of sites were either coding or conserved non-coding (see Materials and Meth-  
400 ods). Thus, the fraction of the genome experiencing deleterious mutation in our simula-  
401 tions of strong BGS (which we define as  $U$ ) was 0.2046. The patterns we observed in  
402 these simulations likely represent an upper bound on the strength of BGS in the human  
403 genome. We therefore lowered the impact of BGS by reducing  $U$  (see Materials and  
404 Methods). When  $U$  is decreased 2-4 fold, we continued to observe a stepwise decrease  
405 in  $\pi/\pi_0$  similar to our simulations of  $U = 0.2046$ , with the specific rank order of African,  
406 followed by European, and then East Asian populations (Fig S8). As expected,  $\pi/\pi_0$  in-  
407 creased overall for all populations as the fraction of sites that were simulated as delete-  
408 rious was decreased ( $\pi/\pi_0 = 0.641$  vs.  $0.802$ ,  $0.62$  vs.  $0.777$ , and  $0.611$  vs.  $0.777$  for  
409 AFR, EUR, and EASN when  $U = 0.1023$  and  $U = 0.05115$ , respectively).

410

## 411 Discussion

412 In our analyses of thousands of genomes from globally distributed human popu-  
413 lations, we have confirmed that neutral variation in humans is governed largely by the  
414 processes of both linked selection and demography. While this observation is not unex-  
415 pected, we have characterized for the first time the dynamic consequences of non-  
416 equilibrium demographic processes in regions of BGS. We find that demography's ef-  
417 fect in these regions do not result in the same relative magnitude of decreased neutral  
418 diversity across populations. Instead, relative diversity in regions of BGS is highly de-  
419 pendent on a population's demographic history, with bottlenecks playing a particularly  
420 strong role. For example, the strongest overall decreases in relative diversity occur in

421 the East Asian continental group, which is expected if they also suffered the strongest  
422 population bottlenecks. To remove any possible biases that would influence our results,  
423 we controlled for functional effects of mutations, variability in mutation along the ge-  
424 nome, potential sequencing artifacts, GC-based gene conversion, and the potential mu-  
425 tagenic effects of recombination hotspots. None of these factors qualitatively affected  
426 our results.

427 We do recognize that one caveat of our controls is the fact that divergence itself  
428 is not independent of BGS [63], and this may present biases when using divergence to  
429 control for variation in mutation rate along the genome. This is because the rate of coa-  
430 lesence in the ancestral population of two groups will be faster in regions of strong  
431 BGS compared to regions of weak BGS due to the lower  $N_e$  of the former, leading to a  
432 decrease in overall divergence in those regions. To limit the contribution of such biases  
433 in ancestral  $N_e$  to divergence, we use rhesus macaque since it is more distantly related  
434 to humans than other primate species such as orangutan or chimpanzee (human-  
435 rhesus divergence: 29.6 MYA; [64]). However, biases in divergence due to BGS can be  
436 still be observed between species as distantly related as human and mouse [63] (hu-  
437 man-mouse divergence: 75 MYA; [65]). Despite this, the apparent correlation between  
438 BGS and divergence should not qualitatively affect our results of relative diversity. Ra-  
439 ther, it is likely that differences in normalized diversity between different BGS bins are  
440 greater than what we observe here. Normalizing by the lower divergence that is charac-  
441 teristic of strong BGS bins and the higher divergence that is characteristic of weak BGS  
442 bins should make any differences between the two smaller, not greater. In fact, for our  
443 calculations of relative diversity in which we skip the normalization step, the differences



444 in diversity between the strongest 1% and weakest 1% BGS bins are greater and give a  
445 lower ratio of relative diversity ( $\pi/\pi_0$  for AFR is 0.373 without the divergence step and  
446 0.402 with the divergence step). A similar pattern is also observed for other continental  
447 groups (compare Fig 2 and Fig S5). More importantly though, we should not expect the  
448 potential biases of our divergence step to contribute to the differences in relative diversi-  
449 ty between each of the continental groups since biases in divergence across the ge-  
450 nome should impact all human populations equally.

451 We also note that the estimates of  $B$  by McVicker et al. [6] may be biased by  
452 model assumptions concerning mutation rates and the specific sites subject to purifying  
453 selection, with the exact values of  $B$  also unlikely to be precisely inferred. However, a  
454 similar study by Comeron et al. [29] that investigated BGS in *Drosophila* and utilized the  
455 same model of BGS as McVicker et al. found that biases presented by model assump-  
456 tions or mis-inference on the exact value of  $B$  do not significantly change the overall  
457 rank order for the inferred strength of BGS across the genome. Thus we, expect  
458 McVicker et al.'s inference of  $B$  to provide good separation between the weakest and  
459 strongest regions of BGS in the human genome, with model misspecification unlikely to  
460 change our empirical results.

461 The increased population differentiation we observe in regions of strong BGS are  
462 consistent with the increased action of genetic drift occurring in genomic regions with  
463 characteristically low  $N_e$ , which has been predicted theoretically [66,67] and observed in  
464 previous studies [57,68,69]. Here, we replicate this pattern by measuring  $F_{ST}$  as a func-  
465 tion of  $B$  across a global set of populations, providing a rich description of global human  
466 population differentiation across the genome. Furthermore, unlike previous studies of

467  $F_{ST}$  in humans that have been plagued by biases due to SNP ascertainment or allele  
468 frequency [56], we make use of SNP data from publically available KhoeSan genomes  
469 to select a set of truly informative SNPs for estimating  $F_{ST}$ . Our results show that popu-  
470 lation differentiation can be dramatically influenced by BGS, with estimates of  $F_{ST}$  at  
471 neutral sites in the weakest 2% BGS bin and strongest 2% BGS bin in the genome dif-  
472 fering by 23.6%-70.1% when we compare all pairs of continental groups (Fig 4A). When  
473 accounting for differences using recombination rate alone, pairs of continental groups  
474 showed little change at all (Fig 4B), thus demonstrating the added value of using explicit  
475 models of linked selection when resolving properties of neutral variation across the ge-  
476 nome.

477         While we focus specifically on the effects of BGS on generating local patterns of  
478 diversity across humans, there is still a possibility that the effects of positive selection,  
479 through recurrent-hitchhiking, soft-sweeps, and classic selective sweeps, are contrib-  
480 uting to these patterns as well. Models taking into account both the effects of purifying  
481 selection and positive selection will be necessary to provide a full description of the im-  
482 pact of linked selection across the human genome and its behavior as a function of dif-  
483 ferent population demographic histories [42]. Development of mathematical models  
484 characterizing the joint effects of both BGS and genetic hitchhiking [24] as well as their  
485 recent application to different species [30,44], gives promise towards this goal. Recent-  
486 ly, a joint model of classic selective sweeps and BGS was applied to *Drosophila* and  
487 predicted that BGS has had a ~1.6 to 2.5-fold greater effect on neutral genetic diversity  
488 than classic selective sweeps [30]. We should expect this magnitude to be even greater  
489 for humans, since classic selective sweeps were found to be rare in recent human evo-

490 lution [38] and adaptive substitutions in the human genome are much less frequent  
491 than *Drosophila* [5,70,71]. Despite this, we still attempt to alleviate any contribution from  
492 other modes of linked selection by masking out regions of hard-sweeps or soft-sweeps  
493 using a novel H12-like method [72] that uses an integrated haplotype homozygosity  
494 framework [36] to scan for population specific signatures of these events in the genome  
495 ([73]; S2 Appendix). While there may still be some residual contribution of these events  
496 to our estimates of  $\pi/\pi_0$ , if such signatures do exist, they are likely to localize where  
497 BGS is also expected to act. Thus, it is possible that our empirical results describe the  
498 consequences of non-equilibrium demography in the broader context of both positive  
499 and purifying modes of linked selection. Indeed, our simulations of BGS fail to capture  
500 the complete effects of linked selection on reducing  $\pi/\pi_0$  in different human populations  
501 (compare Figs 2B and 6C) and the additional contribution of hitchhiking, which we did  
502 not simulate, may explain this discrepancy.

503         Non-equilibrium demography has also been recently investigated with  
504 regard to its impact on patterns of deleterious variation across human populations. Initial  
505 work comparing non-synonymous and synonymous sites in European-Americans and  
506 African-Americans found that, while African-Americans have a greater number of  
507 segregating non-synonymous and synonymous sites than European-Americans,  
508 European-Americans have an overall greater amount of non-synonymous and  
509 synonymous homozygous derived alleles [50]. Other work showed similar findings  
510 [62,74], with Henn et al. [75] demonstrating that the number of deleterious derived  
511 alleles per genome increased with distance from Africa. In addition, similar results in  
512 human founder populations [76,77], *Arabidopsis* [78], and domesticated species such

513 as dogs [12] and sunflowers [79] further demonstrate the pervasive impact that  
514 demography has on influencing the relative amount of deleterious variation across a  
515 variety of populations and species. Since BGS itself is a function of deleterious  
516 variation, it is not surprising that we also witness differences in  $\pi/\pi_0$  across human  
517 populations that have experienced different demographic histories. These effects are  
518 likely ubiquitous across other species as well. However, there has been recent  
519 contention about whether the previously described patterns of increased deleterious  
520 variation are driven by a decrease in the efficacy of natural selection or are solely  
521 artifacts of the response of deleterious variation to demographic change [51,52,80–82].  
522 Following a strong population bottleneck, a transient increase in the relative ratio of  
523 deleterious variation to neutral variation is expected, that is independent of the efficacy  
524 of selection [47,48]. Since our own investigation focuses solely on neutral variants, we  
525 can only invoke differences in population demography and drift on causing the  
526 differences between populations, supporting the conjecture that demographic processes  
527 may transiently dominate patterns of diversity at sites that may be under the direct  
528 influence (or in the case of BGS, indirect influence) of purifying selection.

529         Recently, Koch et al. [49] investigated the temporal dynamics of human  
530 demography on selected sites and observed that after a population contraction,  
531 heterozygosity at selected sites can undershoot its expected value at equilibrium as  
532 low-frequency variants are lost at a quicker rate before the recovery of intermediate  
533 frequency variants can occur. In the context of BGS, which skews the site frequency  
534 spectrum of linked neutral mutations towards rare variants [23,83], we also expect a  
535 transient decrease in diversity as low-frequency variants are lost quickly during a

536 population contraction. This effect may be driving the results of the greater losses of  
537 relative diversity in non-African populations, but further work is needed to better  
538 understand the impact of population contractions on perturbing the site-frequency  
539 spectrum of regions under BGS. Koch et al. demonstrate that this effect is only  
540 temporary and that long-term diversity at selected sites approaches greater values once  
541 equilibrium is reached. We stress that these temporal effects also impact the patterns of  
542 neutral diversity caused by BGS and likely explain the differences of  $\pi/\pi_0$  that we  
543 observed in humans. We predict that as evolution continues forward through time, the  
544 magnitude and rank order of relative diversity among populations may change.  
545 However, this will be highly dependent on the demographic effects that different  
546 populations experience. Although more flexible modeling frameworks that can account  
547 for BGS under changing population size have been recently developed [45,46], they as-  
548 sume that selection is strong enough that the impact of demography does not perturb  
549 mutation-selection balance, and they also ignore the additional impact that demography  
550 itself has on perturbing neutral variants.

551         A greater contemporary  $N_e$  in non-Africans could theoretically result in a greater  
552 efficacy of purifying selection and, consequently, a stronger impact of BGS. However, it  
553 is very unlikely that this is occurring or driving the observed patterns of relative diversity  
554 that we see. The greater contemporary population size of non-Africans has transpired  
555 only in the very recent past, with accelerated growth in Europeans occurring within the  
556 last few hundred generations [62,84–87]. Thus, most population specific mutations in  
557 non-Africans have arisen only during this recent population expansion and are both  
558 young and very rare [88,89]. It is doubtful that these population-specific variants have

559 had enough time to exercise a large effect on the absolute strength of BGS itself.  
560 Rather, our simulations indicate that the response of  $\pi$  in regions under BGS is driven  
561 by population contractions, with reductions in  $\pi/\pi_0$  occurring concomitantly with the out-  
562 of-Africa bottleneck and European-East Asian split bottleneck events (Fig 6) and contin-  
563 uing even after the European and East Asian expansion events. Interestingly though,  
564 our simulations reveal an additional factor that can influence the impact of BGS within  
565 populations – migration between populations. We observe that the exchange of deleterious  
566 variants between populations can impact linked selection and lead to decreases in  
567  $\pi/\pi_0$  in populations of constant size, such as the recent history inferred for Africans (Fig  
568 6B). In particular, a decrease in  $\pi/\pi_0$  for Africans coincides with decreases in  $\pi/\pi_0$  for  
569 non-Africans. This trend disappears, though, once migration is removed (Fig S7). This  
570 result suggests that the migration of nearly neutral or mildly deleterious alleles in Euro-  
571 peans/East Asians into Africans results in those variants being more strongly selected in  
572 Africans due to their historically larger  $N_e$ , resulting in stronger BGS and lower  $\pi$ . How-  
573 ever, more work is needed to definitively test this. Conversely, migration of African al-  
574 leles into Europeans/East Asians has no noticeable effect on  $\pi$  in our simulations with  
575 BGS (compare solid lines in Fig 6B and Fig S7B). In simulations where  $U$  is lower than  
576 our base level of 0.2046, we also witness differences in  $\pi/\pi_0$  between simulations with  
577 and without migration. Some of these involve rank order changes in  $\pi/\pi_0$  between Afri-  
578 cans, Europeans, and East Asians (Fig S8,  $U = 0.02046$  with migration vs. no migra-  
579 tion), which is likely a consequence of the increased stochasticity that migration be-  
580 tween populations introduces, as simulations without migration restored the consistent  
581 patterns of  $\pi/\pi_0$ . These results demonstrate the complexities that migration introduces to

582 patterns of diversity in regions of linked selection and to the dynamic changes of  $\pi/\pi_0$   
583 over time.

584         While we describe here the differential effects of non-equilibrium demography on  
585 neutral diversity in regions under strong and weak BGS, it is worth mentioning that dif-  
586 ferences in the reduction of neutral diversity in the genome between different popula-  
587 tions have also been investigated at the level of entire chromosomes. In particular,  
588 analyses of neutral diversity comparing autosomes to non-autosomes (i.e., sex chromo-  
589 somes and the mitochondrial genome [mtDNA]) have been conducted. Interestingly,  
590 these studies have shown that population contractions have impacted the relative re-  
591 duction of neutral diversity between non-autosomes and autosomes in a similar fashion  
592 to what we have observed between regions of strong BGS and weak BGS, with the  
593 greatest losses occurring in bottlenecked populations. This was demonstrated in both  
594 humans and *Drosophila* [90,91] and later modeled [92], showing that stronger genetic  
595 drift due to the lower  $N_e$  of non-autosomes causes diversity to be lost more quickly in  
596 response to population size reductions. Recent work in humans has confirmed such  
597 predictions by showing that relative losses of neutral diversity in the non-autosomes are  
598 greatest for non-Africans [93–95]. These studies, plus others [96], have also shown that  
599 there is strong evidence for a more dominant effect of linked selection on the sex chro-  
600 mosomes relative to the autosomes in humans.

601         Since linked selection is a pervasive force in shaping patterns of diversity across  
602 the genomes in a range of biological species [1], it has been provided as an argument  
603 for why neutral diversity and estimates of  $N_e$  are relatively constrained across species in  
604 spite of the large variance in census population sizes that exist [44,97]. However, since

605 population bottlenecks are common among species and have an inordinate influence on  
606  $N_e$  [20], demography has also been argued as a major culprit for constrained diversity  
607 [2,97–99]. Yet, as we show in humans, it is likely that patterns of neutral diversity are in  
608 fact jointly impacted by both of these forces, magnifying one another to deplete levels of  
609 diversity beyond what is expected by either one independently. In our work, we also  
610 identify a potentially substantial role for migration from smaller populations that harbor  
611 more strongly deleterious alleles on patterns of linked neutral diversity in large popula-  
612 tions. Together, these combined effects may help provide additional clues for the puz-  
613 zling lack of disparity in genetic diversity among different species [100].

614 Our results give caution that not properly accounting for the impacts of demogra-  
615 phy on patterns driven by linked selection may lead to spurious rejections of certain  
616 models of linked selection in favor of others. For example, when comparing humans to  
617 other primates, a recent study by Nam et al. [101] found a greater relative decrease of  
618 neutral genetic diversity in regions close to genes (where linked selection is greatest)  
619 versus regions far away from genes in non-human primate species. The authors sug-  
620 gest that these patterns are best described by the action of selective sweeps since non-  
621 human primate populations usually exhibit a larger  $N_e$  and thus should experience a  
622 greater influx of adaptive alleles per unit time. However, certain orangutan, gorilla, and  
623 chimpanzee species have also experienced large population contractions in their recent  
624 history that are comparable in time and potentially more extreme in scale to what hu-  
625 mans have also experienced [102–105]. Thus, the consequences of strong demograph-  
626 ic change to regions of BGS can provide an alternative explanation for why these pri-  
627 mate species exhibit a larger relative reduction in neutral diversity near genes, despite



628 their larger historical  $N_e$ . While Nam et al. also test for BGS using simulations with de-  
629 mography, their model assumed a more limited population contraction (50% population  
630 reduction) over a shorter time scale than the demographic model we test.

631 Finally, our results also have implications for human medical genetics research,  
632 since selection may be acting on functional regions contributing to disease susceptibil-  
633 ity. Since different populations will have experienced different demographic histories,  
634 the action of linked selection may result in disparate patterns of genetic variation (with  
635 elevated levels of drift) near causal loci. Recent work has already demonstrated that  
636 BGS's consequence of lowering diversity impacts power for disease association tests  
637 [106]. Our results indicate that this impact may be even further exacerbated by demog-  
638 raphy in bottlenecked populations, leading to potentially larger discrepancies in power  
639 between different populations. Overall, this should encourage further scrutiny for tests  
640 and SNP panels optimized for one population since they may not be easily translatable  
641 to other populations. It should also further motivate investigators to simultaneously ac-  
642 count for demography and linked selection when performing tests to uncover disease  
643 variants within the genome [88,106,107].

644

## 645 **Materials and methods**

### 646 **Data**

647 2,504 samples from 26 populations in phase 3 of the Thousand Genomes Project  
648 (TGP) [9] were downloaded from <ftp://ftp.ncbi.nlm.nih.gov/1000genomes/>. vcftools  
649 (v0.1.12a) [108] and custom python scripts were used to gather all bi-allelic SNP sites  
650 from the autosomes of the entire sample set.

651 A subset of TGP samples that were sequenced to high coverage (~45X) by  
652 Complete Genomics (CG) were downloaded from  
653 <ftp://ftp.ncbi.nlm.nih.gov/1000genomes/>. After filtering out related individuals via pedi-  
654 gree analyses, we analyzed 53 YRI, 64 CEU, and 62 CHS samples (Table S2). The  
655 cgatools (v1.8.0) listvariants program was first used to gather all SNPs from the 179  
656 samples using their CG ASM “Variations Files” (CG format version 2.2). Within each  
657 population, the number of reference and alternate allele counts for each SNP was then  
658 calculated using the cgatools testvariants program and custom python scripts. Only al-  
659 lele counts across high quality sites (i.e., those classified as VQHIGH variant quality by  
660 CG) were included. Low quality sites (i.e., those with VQLOW variant quality) were  
661 treated as missing data. Only autosomes were kept. Non-bi-allelic SNPs and sites vio-  
662 lating Hardy-Weinberg equilibrium (HWE) (p-value < 0.05 with a Bonferroni correction  
663 for multiple SNP testing) were also removed.

664 We collected 13 whole-genome sequenced KhoeSan samples (sequence-  
665 coverage: 2.5-50X, see Table S3 in Supporting information) from 3 studies [75,109,110]  
666 and used the processed vcf files from each of those respective studies to gather all bi-  
667 allelic polymorphic SNPs (i.e., the union of variants across all vcf files). SNPs were only  
668 retained if they were polymorphic within the 13 samples (i.e., sites called as alternate  
669 only within the sample set were ignored).

670

## 671 **Filtering and ascertainment scheme**

672 Positions in the genome were annotated for background selection by using the  
673 background selection coefficient,  $B$ , which was inferred by McVicker et al. [6] and down-

674 loaded from <http://www.phrap.org/othersoftware.html>.  $B$  was inferred by applying a clas-  
675 sical model of BGS [53], which treats its effects as a simple reduction in  $N_e$  at neutral  
676 sites as a function of their recombination distance from conserved loci, the strength of  
677 purifying selection at those conserved loci, and the deleterious mutation rate.  $B$  can be  
678 interpreted as the reduced fraction of neutral genetic diversity at a particular site along  
679 the genome that is caused by BGS, with a value of 0 indicating a near complete remov-  
680 al of neutral genetic diversity due to BGS and a  $B$  value of 1 indicating little to no effect  
681 of BGS on neutral genetic diversity ( $B = \pi/\pi_0 = N_e/N_0$ ). Positions for  $B$  were lifted over  
682 from hg18 to hg19 using the UCSC liftOver tool. Sites that failed to uniquely map from  
683 hg18 to hg19 or failed to uniquely map in the reciprocal direction were excluded. Sites  
684 lacking a  $B$  value were also ignored. We focused our analyses on those regions of the  
685 genome within the top 1%, 5%, 10%, and 25% of the genome-wide distribution of  $B$  and  
686 within the bottom 1% of the genome-wide distribution of  $B$ . These quantiles correspond  
687 to the  $B$  values 0.095, 0.317, 0.463, 0.691, and 0.994, respectively.

688 A set of 13 filters (referred to as the “13-filter set”) were used to limit errors from  
689 sequencing and misalignments with rhesus macaque and to remove regions potentially  
690 under the direct effects of natural selection and putative selective sweeps (we ignore  
691 the linked selection effects of background selection). These filters were applied to all  
692 samples in phase 3 TGP (all filters are in build hg19) for all sets of analyses (see Table  
693 S4 in Supporting information for the total number of Mb that passed the described filters  
694 below for each particular  $B$  quantile):

695 1. Coverage/exome: For phase 3 data, regions of the genome that were part of  
696 the high coverage exome were excluded (see

697 [ftp://ftp.ncbi.nlm.nih.gov/1000genomes/ftp/technical/reference/exome\\_pull\\_do](ftp://ftp.ncbi.nlm.nih.gov/1000genomes/ftp/technical/reference/exome_pull_down_targets/20130108.exome.targets.bed)  
698 [wn\\_targets/20130108.exome.targets.bed](wn_targets/20130108.exome.targets.bed).README). This was done to limit  
699 biases due to differing levels of coverage across the genome and to remove  
700 likely functional sites within the exome.

701 2. phyloP: Sites with phyloP [111] scores  $> 1.2$  or  $< -1.2$  were removed to limit  
702 the effects of natural selection due to conservation or accelerated evolution.  
703 Scores were downloaded from  
704 <http://hgdownload.cse.ucsc.edu/goldenPath/hg19/phyloP46way/>.

705 3. phastCons: Regions in the UCSC conservation 46-way track (table:  
706 [phastCons46wayPlacental](#)) [112] were removed to limit the effects of natural  
707 selection due to conservation.

708 4. CpG: CpG islands in the UCSC CpG islands track were removed because of  
709 their potential role in gene regulation and/or being conserved.

710 5. ENCODE blacklist: Regions with high signal artifacts from next-generation  
711 sequencing experiments discovered during the ENCODE project [113] were  
712 removed.

713 6. Accessible genome mask: Regions not accessible to next-generation se-  
714 quencing using short reads, according to the phase 3 TGP “strict” criteria,  
715 were removed (downloaded from  
716 [ftp://ftp.ncbi.nlm.nih.gov/1000genomes/ftp/release/20130502/supporting/acce](ftp://ftp.ncbi.nlm.nih.gov/1000genomes/ftp/release/20130502/supporting/accessible_genome_masks/StrictMask/)  
717 [ssible\\_genome\\_masks/StrictMask/](#)).

718 7. Simple repeats: Regions in the UCSC simple repeats track were removed  
719 due to potential misalignments with outgroups and/or being under natural se-

- 720           lection.
- 721           8. Gaps/centromeres/telomeres: Regions in the UCSC gap track were removed,  
722           including centromeres and telomeres.
- 723           9. Segmental duplications: Regions in the UCSC segmental dups track [114]  
724           were removed to limit potential effects of natural selection and/or misalign-  
725           ments with rhesus macaque.
- 726           10. Transposons: Active transposons (HERVK retrotransposons, the AluY sub-  
727           family of Alu elements, SVA elements, and L1Ta/L1pre-Ta LINEs) in the hu-  
728           man genome were removed.
- 729           11. Recent positive selection: Regions inferred to be under hard and soft selec-  
730           tive sweeps (using iHS and iHH12 regions from selscan v1.2.0 [73]; S2 Ap-  
731           pendix) within each phase 3 population were removed.
- 732           12. Non-coding transcripts: Non-coding transcripts from the UCSC genes track  
733           were removed to limit potential effects of natural selection.
- 734           13. Synteny: Regions that did not share conserved synteny with rhesus macaque  
735           (rheMac2) from UCSC syntenic net filtering were removed (downloaded from  
736           <http://hgdownload.soe.ucsc.edu/goldenPath/hg19/vsRheMac2/syntenicNet/>).
- 737           Additionally, an extra set of filters was applied, but only for those estimates of diversity  
738           that controlled for GC-biased gene conversion and recombination hotspots:
- 739           14. GC-biased gene conversion (gBGC): Regions in UCSC phastBias track [115]  
740           from UCSC genome browser were removed to limit regions inferred to be un-  
741           der strong GC-biased gene conversion.
- 742           15. Recombination hotspots: All sites within 1.5 kb (i.e., 3 kb windows) of sites

743 with recombination rates  $\geq 10$  cM/Mb in the 1000G OMNI genetic maps for  
744 non-admixed populations (downloaded from [ftp://ftp-  
745 trace.ncbi.nih.gov/1000genomes/ftp/technical/working/20130507\\_omni\\_reco  
746 mbination\\_rates/](ftp://ftp-trace.ncbi.nih.gov/1000genomes/ftp/technical/working/20130507_omni_recombination_rates/)) and the HapMap II genetic map [116] were removed. 1.5 kb  
747 flanking regions surrounding the center of hotspots identified by Ref. [117]  
748 (downloaded from  
749 [http://science.sciencemag.org/content/sci/suppl/2014/11/12/346.6211.125644  
750 2.DC1/1256442\\_DatafileS1.txt](http://science.sciencemag.org/content/sci/suppl/2014/11/12/346.6211.1256442.DC1/1256442_DatafileS1.txt)) were also removed, except for the cases in  
751 which the entire hotspot site was greater than 3 kb in length (in which case  
752 just the hotspot was removed).

753 To generate a set of four-fold degenerate synonymous sites, all polymorphic  
754 sites that we retained from the high-coverage Complete Genomic samples were anno-  
755 tated using the program ANNOVAR [118] with Gencode V19 annotations. ANNOVAR  
756 and Gencode V19 annotations were also used to gather an autosome-wide set of four-  
757 fold degenerate sites, resulting in 5,188,972 total sites.

758

## 759 **Demographic inference**

760 The inference tool *dadi* (v1.6.3) [7] was used to fit, via maximum likelihood, the 3-  
761 population 13-parameter demographic model of Gutenkunst et al. [7] to the 179 YRI,  
762 CEU, and CHS samples from the high coverage CG dataset of TGP. This sample set  
763 consisted of 53 YRI (African), 64 CEU (European), and 62 CHS (East Asian) samples.  
764 The demographic model incorporates an ancient human expansion in Africa and a sin-  
765 gular out-of-Africa bottleneck followed by European- and East Asian-specific bottlenecks,

766 as well as exponential growth in both non-African populations and migration between  
767 populations. During the inference procedure, each population was projected down to  
768 106 chromosomes, corresponding to the maximum number of chromosomes available  
769 in the CG YRI population. Sites were polarized with chimpanzee to identify putative an-  
770 cestral/derived alleles using the chain and netted alignments of hg19 with panTro4  
771 (<http://hgdownload.soe.ucsc.edu/goldenPath/hg19/vsPanTro4/axtNet/>), and the correc-  
772 tion for ancestral misidentification [119] option in dadi was used. The 13-filter set de-  
773 scribed previously was applied to the CG data set, and an additional filter keeping only  
774 the weakest ~1% of autosomal sites under background selection ( $B \geq 0.994$ ) was also  
775 applied in order to mitigate potential biases in inference due to BGS [59,60] or other  
776 forms of linked selection [120]. After site filtering and correction for ancestral misidentifi-  
777 cation, a total of 110,582 segregating sites were utilized by dadi for the inference proce-  
778 dure. For optimization, grid points of 120, 130, and 140 were used, and 15 independent  
779 optimization runs were conducted from different initial parameter points to ensure con-  
780 vergence upon a global optimum. An effective sequence length ( $L$ ) of 7.15 Mb was cal-  
781 culated from the input sequence data after accounting for the fraction of total sites re-  
782 moved due to filtering. In addition to the 13-filter set, this filtering included sites violating  
783 HWE, sites without  $B$  value information, sites that did not have at least 106 sampled  
784 chromosomes in each population, sites with more than two alleles, sites that did not  
785 have tri-nucleotide information for the correction for ancestral misidentification step, and  
786 sites treated as missing data. For calculating the reference effective population size, a  
787 mutation rate ( $\mu$ ) of  $1.66 \times 10^{-8}$  (inferred from Ref. [121]) was used. Using the optimized  
788  $\theta$  from dadi after parameter fitting, the equation  $\theta = 4N_e\mu L$  was solved for  $N_e$  to generate

789 the reference effective population size, from which all other population  $N_e$ 's were calcu-  
790 lated. This same procedure was also used to infer demographic parameters from four-  
791 fold degenerate synonymous sites across the same set of samples. After site filtering  
792 (note that  $B$  and the 13-filter set were not included in the filtering step for four-fold de-  
793 generate synonymous sites), 41,260 segregating sites were utilized by dadi for the in-  
794 ference procedure, and an effective sequence length of 2.37 Mb was used for calculat-  
795 ing the reference effective population size.

796

## 797 **Simulations**

798 Forward simulations incorporating the results from the demographic inference  
799 procedure described above and a model of background selection were conducted using  
800 SFS\_CODE [122]. For the model of background selection, the recombination rate,  $\rho$ ,  
801 and the fraction of the genome experiencing deleterious mutation,  $U$ , was calculated us-  
802 ing the 2 Mb region of chr3: 48,600,000-50,600,000, which has been subject to the  
803 strongest amount of BGS in the human genome (mean  $B = 0.002$ ). A population-scaled  
804 recombination rate ( $\rho$ ) of  $6.0443 \times 10^{-5}$  was calculated for this region using the HapMap  
805 II GRCh37 genetic map [116]. For generating  $U$ , the number of non-coding “functional”  
806 sites in this region was first calculated by taking the union of all phastCons sites and  
807 phyloP sites with scores  $> 1.2$  (indicating conservation) that did not intersect with any  
808 coding exons. This amount totaled to 270,348 base pairs. Additionally, the number of  
809 coding sites was calculated by summing all coding exons within this region from GEN-  
810 CODE v19, which totaled to 138,923 base pairs. From these totals, a  $U$  of 0.2046 was  
811 generated.



812           The background selection model was simulated using a middle 30 kb neutral re-  
813 gion flanked by two 1 Mb regions under purifying selection. From the calculated  $U$  de-  
814 scribed above, 20.46% of sites in the two 1 Mb flanking regions were simulated as be-  
815 ing deleterious. Two distributions of fitness effects were used for the deleterious sites,  
816 with 66.06% of deleterious sites using the gamma distribution of fitness effects inferred  
817 across conserved non-coding regions by Ref. [123] ( $\beta = 0.0415$ ,  $\alpha = 0.00515625$ ) and  
818 33.94% of deleterious sites using the gamma distribution of fitness effects inferred  
819 across coding regions by Ref. [5] ( $\beta = 0.184$ ,  $\alpha = 0.00040244$ ). The relative number of  
820 sites receiving each distribution of fitness effects in our simulations was determined by  
821 the relative number of non-coding “functional” sites and coding exons described above.  
822 Gamma distribution parameters are scaled to the ancestral population size of the de-  
823 mographic models used in Refs. [5,123]. To simulate varying levels of background se-  
824 lection strength, different total fractions of our calculated  $U$  were used (5%, 10%, 25%,  
825 50%, and 100% of 0.2046) but with the same relative percentage of non-coding and  
826 coding sites just described. To simulate only the effects of demography without back-  
827 ground selection (i.e.,  $U = 0$ ), only the 30 kb neutral region was simulated. 2,000 inde-  
828 pendent simulations were conducted for each particular  $U$  (12,000 total). Simulations  
829 output population genetic information every 100 generations and also at each genera-  
830 tion experiencing a population size change (22,117 total generations were simulated),  
831 for which mean pairwise nucleotide diversity ( $\pi$ ) was calculated across the 2,000 simu-  
832 lations.

833

834 **Calculating recombination rate across the genome**

835           We used recombination rate estimates from the HapMap II GRCh37 genetic  
836 map. To annotate sites in phase 3 that were not in HapMap II, recombination rates were  
837 interpolated to the midway point between the preceding and following positions in Hap-  
838 Map II. If the difference between successive HapMap II positions was greater than  
839 18,848 base pairs (the first standard deviation for the distribution of distances between  
840 positions in HapMap II), then the recombination rate was only extended out 9,424 base  
841 pairs beyond the focal position. Positions beyond this distance were then ignored during  
842 analysis in which the recombination rate was used. Recombination rate quantiles were  
843 calculated using the genome-wide distribution of recombination rates (i.e., the distribu-  
844 tion of recombination rates across all sites, including those that are not polymorphic in  
845 the data set) resulting from the procedure described above.

846

847

#### 848 **Population-specific calculations of diversity**

849           Mean pairwise genetic diversity ( $\pi$ ) was calculated as a function of the  $B$  quantile  
850 bins described in “Filtering and ascertainment scheme” for each of the 20 non-admixed  
851 populations in phase 3 TGP and across 4 broad populations that grouped the 20 non-  
852 admixed populations together by continent (African, European, South Asian, and East  
853 Asian, see Table S11 in Supporting information). Additionally, only regions of the ge-  
854 nome passing the 13-filter set were used in the diversity calculations (see Table S4 in  
855 Supporting information for total number of Mb used in diversity calculations for each  $B$   
856 quantile). For estimates of diversity controlling for gBGC or recombination hotspots, the  
857 additional corresponding filters described in “Filtering and ascertainment scheme” were

858 also used. Only 100 kb regions of the genome with at least 10 kb of divergence infor-  
859 mation with Rhesus macaque were used in the diversity calculations (see “Normaliza-  
860 tion of diversity and divergence calculations with Rhesus macaque” below).

861

## 862 **Ancestry specific calculations of diversity**

863 To calculate genetic diversity as a function of local ancestry across the admixed  
864 phase 3 population samples, we used the ancestry deconvolution results generated by  
865 the 1000 Genomes Project Consortium (see  
866 [ftp://ftp.ncbi.nlm.nih.gov/1000genomes/ftp/technical/working/20140818\\_ancestry\\_decon](ftp://ftp.ncbi.nlm.nih.gov/1000genomes/ftp/technical/working/20140818_ancestry_decon)  
867 [volutio/README\\_20140721\\_phase3\\_ancestry\\_deconvolution](volutio/README_20140721_phase3_ancestry_deconvolution)). Briefly, the local-  
868 ancestral inference tool, RFMix [124], was run across the ACB, ASW, CLM, MXL, PEL,  
869 and PUR phase 3 TGP samples. For the reference panel, 50 unrelated shapeit2 [125]  
870 trio-phased YRI and CEU samples each (from phase 3 TGP) and 43 shapeit2 popula-  
871 tion-phased Native American samples (from Ref. [126]) were used. We utilized local an-  
872 cestry tracks that were inferred by RFMix using “trio-phased” mode.

873 Admixed samples were then parsed for all genomic segments homozygous for  
874 each particular ancestry (i.e., African, European, or Native American). These homozy-  
875 gous segments were also filtered according to the 13-filter set described in “Filtering  
876 and ascertainment scheme.” Heterozygosity was calculated across admixed samples  
877 for each set of homozygous ancestries and  $B$  quantile bins described previously. Sam-  
878 ples were included in the analyses only if the total length of their genome that passed all  
879 filters for the particular ancestry and  $B$  quantile bin was greater than 1 Mb. Additionally,  
880 only 100 kb segments that had at least 10 kb of divergence information with Rhesus

881 macaque were used (see below). Per-site heterozygosity estimates for each ancestry  
882 and  $B$  quantile set were averaged across all admixed samples, regardless of their TGP  
883 population of origin. See Table S5 in Supporting information for total number of Mb used  
884 in the analyses. Additionally, heterozygosity was also calculated across the 4 continen-  
885 tal groups using the same 13-filter set and as a function of the same  $B$  quantile bins.

886

### 887 **Normalization of diversity and divergence calculations with Rhesus macaque**

888 To calculate human divergence with Rhesus macaque, we downloaded the  
889 syntenic net alignments between hg19 and rheMac2 that were generated by blastz from  
890 <http://hgdownload.cse.ucsc.edu/goldenpath/hg19/vsRheMac2/syntenicNet/>. We binned  
891 the human genome into non-overlapping 100 kb bins and calculated divergence within  
892 each bin by taking the proportion of base pair differences between human and Rhesus  
893 macaque. Gaps between human and Rhesus macaque, positions lacking alignment in-  
894 formation, and positions that did not pass the 13-filter set described in “Filtering and  
895 ascertainment scheme” were ignored in the divergence estimate. Additionally, a sepa-  
896 rate set of divergence estimates were also made using the additional set of filtering cri-  
897 teria that removed those regions under gBGC or in recombination hotspots and were  
898 used for normalizing diversity in those measurements that controlled for gBGC and  
899 hotspots.

900 When normalizing diversity by divergence, only 100 kb bins that had at least 10  
901 kb of divergence information were used (21,100 bins total for 13-filter set, 20,935 bins  
902 total for the 13-filter set plus the additional gBGC and hotspot filters). Bins with less than  
903 10 kb of divergence information were ignored. To make estimates comparable, in those

904 measurements of diversity that did not normalize by divergence, diversity was still calcu-  
905 lated using the same set of 100 kb bins that had at least 10 kb for estimating diver-  
906 gence.

907

## 908 **Calculations of population differentiation ( $F_{ST}$ ) and linear regression**

909  $F_{ST}$  calculations were performed as a function of  $B$  and recombination rate be-  
910 tween every pair of non-admixed phase 3 TGP populations not belonging to the same  
911 continental group (150 pairs total). We followed the recommendations in Bhatia et al.  
912 [56] to limit biases in  $F_{ST}$  due to 1) type of estimator used, 2) averaging over SNPs, and  
913 3) SNP ascertainment. Specifically, we 1) used the Hudson-based  $F_{ST}$  estimator [127],  
914 2) used a ratio of averages for combining  $F_{ST}$  estimated across different SNPs, and 3)  
915 ascertained SNPs based on being polymorphic in an outgroup (i.e., the KhoeSan). For  
916 ascertaining SNPs in the KhoeSan, we also performed filtering according to the filtering  
917 scheme described under “Filtering and ascertainment scheme.” For a position to be  
918 considered polymorphic in the KhoeSan, at least one alternate allele and one reference  
919 allele had to be called across the 13 genomes we utilized (see “Data”). These criteria  
920 left 3,497,105 total sites in the genome in the phase 3 dataset for  $F_{ST}$  to be estimated  
921 across.

922  $F_{ST}$  was calculated across either 2% quantile bins of  $B$  or 2% quantile bins of  
923 recombination rate in order to perform simple linear regression, with either  $B$  or  
924 recombination rate acting as an explanatory variable using the linear model  $F_{ST} = \beta_0 +$   
925  $\beta_1 X + \varepsilon$  (where  $X$  represents either  $B$  or recombination rate  $[\rho]$ ). This was done for all  
926 pairwise comparisons of populations between a specific pair of continental groups (25

927 pairs total) or across all pairwise comparisons using all continental groups (150 pairs  
928 total). Recombination rate was scaled to be between 0 and 1 (the minimum and maxi-  
929 mum observed recombination rate was 0.0 cM/Mb and 126.88 cM/Mb, respectively) to  
930 aid in the comparison of the regression coefficient with  $B$ . Additionally, the mean of the  
931 bounds defining each quantile bin was used when defining the explanatory variables for  
932 the regression. Linear regression, robust linear regression, and simple correlation were  
933 performed using the `lm()`, `rlm()`, and `cor()` functions, respectively, in the R programming  
934 language ([www.r-project.org](http://www.r-project.org)). To generate standard errors of the mean, this same pro-  
935 cedure was performed on  $F_{ST}$  results generated from each of 1,000 bootstrapped  
936 iterations of the data.

937  $F_{ST}$  was also calculated across bins defined by both  $B$  and recombination rate  
938 ( $\rho$ ). For this step, bins were first defined into 2% quantile bins of either variable. Each  
939 2% bin was further defined into 4% quantile bins of the other variable, generating 1,250  
940 separate bins in which  $F_{ST}$  was estimated for both  $B$  and recombination rate  
941 simultaneously. Multiple linear regression and robust regression was performed for the  
942 model  $F_{ST} = \beta_0 + \beta_1 B + \beta_2 \rho + \beta_3 B\rho + \varepsilon$  with the `lm()` and `rlm()` functions in R. As with the  
943 simple linear regression step, recombination rate was scaled to be between 0 and 1 and  
944 the mean of the bounds defining each quantile bin was used when defining the explana-  
945 tory variables.

946

## 947 **Bootstrapping**

948 **Diversity Estimates.** To control for the structure of linkage disequilibrium and correla-  
949 tion between SNPs along the genome, we partitioned the human genome into non-

950 overlapping 100 kb bins (these bins were identical to the 100 kb bins used for estimat-  
951 ing divergence) and calculated mean pairwise diversity ( $\pi$ ) or heterozygosity within each  
952 bin. We also normalized the diversity estimates by divergence within each bin. We then  
953 bootstrapped individual genomes by sampling, with replacement, the 100 kb bins until  
954 the number of sampled bins equaled the number of bins used for calculating the diversi-  
955 ty point estimates (i.e., 21,100 bins or 20,935 bins total, depending on whether filters for  
956 gBGC and hotspots were applied). 1,000 total bootstrap iterations were completed and  
957 standard errors of the mean were calculated by taking the standard deviation from the  
958 resulting bootstrap distribution.

959  $F_{ST}$ . For bootstrapping  $F_{ST}$ , the human genome was partitioned into non-overlapping  
960 100 kb bins and were sampled with replacement until 28,823 bins were selected (the  
961 total number of non-overlapping 100 kb bins in the human autosomes).  $F_{ST}$  was then  
962 calculated genome-wide for the bootstrapped genome as a function of either  $B$  and/or  
963 recombination rate for every pairwise comparison of non-admixed phase 3 TGP popula-  
964 tions not belonging to the same continental group. 1,000 total bootstrap iterations were  
965 completed and standard errors of the mean were calculated by taking the standard de-  
966 viation from the  $F_{ST}$  distribution calculated from all 1,000 iterations.

967

## 968 **Acknowledgements**

969 We thank Lawrence Uricchio, Dominic Tong, Melissa Spear, and Nicolas Strauli for  
970 helpful comments on the manuscript. The computations in this paper were run on the  
971 QB3 Shared Cluster at the University of California, San Francisco.

972

## 973 **Author contributions**

974 Conceived and designed the experiments: RT SAZ RDH.

975 Performed the experiments: RT SAZ.

976 Analyzed the data: RT SAZ.

977 Wrote the paper: RT RDH.

978 Wrote S2 Appendix: SAZ.

979

## 980 **References**

- 981 1. Cutter AD, Payseur BA. Genomic signatures of selection at linked sites: unifying  
982 the disparity among species. *Nat Rev Genet.* Nature Publishing Group; 2013;14:  
983 262–74. doi:10.1038/nrg3425
- 984 2. Ellegren H, Galtier N. Determinants of genetic diversity. *Nat Rev Genet.* 2016;17:  
985 422–433. doi:10.1038/nrg.2016.58
- 986 3. Sabeti PC, Reich DE, Higgins JM, Levine HZP, Richter DJ, Schaffner SF, et al.  
987 Detecting recent positive selection in the human genome from haplotype  
988 structure. *Nature.* Nature Publishing Group; 2002;419: 832–837.  
989 doi:10.1038/nature01027.1.
- 990 4. Williamson SH, Hernandez R, Flidel-Alon a, Zhu L, Nielsen R, Bustamante CD.  
991 Simultaneous inference of selection and population growth from patterns of  
992 variation in the human genome. *Proc Natl Acad Sci U S A.* National Academy of  
993 Sciences; 2005;102: 7882–7887. doi:10.1073/pnas.0502300102
- 994 5. Boyko AR, Williamson SH, Indap AR, Degenhardt JD, Hernandez RD, Lohmueller  
995 KE, et al. Assessing the evolutionary impact of amino acid mutations in the  
996 human genome. *PLoS Genet.* 2008;4: e1000083.  
997 doi:10.1371/journal.pgen.1000083
- 998 6. McVicker G, Gordon D, Davis C, Green P. Widespread genomic signatures of  
999 natural selection in hominid evolution. *PLoS Genet.* 2009;5: e1000471.  
1000 doi:10.1371/journal.pgen.1000471
- 1001 7. Gutenkunst RN, Hernandez RD, Williamson SH, Bustamante CD. Inferring the  
1002 joint demographic history of multiple populations from multidimensional SNP  
1003 frequency data. *PLoS Genet.* 2009;5. doi:10.1371/journal.pgen.1000695
- 1004 8. Li H, Durbin R. Inference of human population history from individual whole-  
1005 genome sequences. *Nature.* 2011;475: 493–496. doi:10.1038/nature10231
- 1006 9. Auton A, Abecasis GR, Altshuler DM, Durbin RM, Abecasis GR, Bentley DR, et al.  
1007 A global reference for human genetic variation. *Nature.* 2015;526: 68–74.  
1008 doi:10.1038/nature15393
- 1009 10. Lack JB, Lange JD, Tang AD, Corbett-Detig RB, Pool JE. A thousand fly  
1010 genomes: An expanded drosophila genome nexus. *Mol Biol Evol.* Oxford



- 1011 University Press; 2016;33: 3308–3313. doi:10.1093/molbev/msw195
- 1012 11. Gibbs RA, Taylor JF, Van Tassell CP, Barendse W, Eversole KA, Gill CA, et al.
- 1013 Genome-Wide Survey of SNP Variation Uncovers the Genetic Structure of Cattle
- 1014 Breeds [Internet]. NIH Public Access; 2009 Apr 24 pp. 528–532.
- 1015 doi:10.1126/science.1167936
- 1016 12. Marsden CD, Ortega-Del Vecchyo D, O'Brien DP, Taylor JF, Ramirez O, Vilà C,
- 1017 et al. Bottlenecks and selective sweeps during domestication have increased
- 1018 deleterious genetic variation in dogs. *Proc Natl Acad Sci.* 2016;113: 152–157.
- 1019 doi:10.1073/pnas.1512501113
- 1020 13. Caicedo AL, Williamson SH, Hernandez RD, Boyko A, Fledel-Alon A, York TL, et
- 1021 al. Genome-wide patterns of nucleotide polymorphism in domesticated rice. *PLoS*
- 1022 *Genet.* Sinauer Associates; 2007;3: 1745–1756.
- 1023 doi:10.1371/journal.pgen.0030163
- 1024 14. Begun DJ, Aquadro CF. African and North American populations of *Drosophila*
- 1025 *melanogaster* are very different at the DNA level. *Nature.* 1993;365: 548–550.
- 1026 doi:10.1038/365548a0
- 1027 15. Haddrill PR, Thornton KR, Charlesworth B, Andolfatto P. Multilocus patterns of
- 1028 nucleotide variability and the demographic and selection history of *Drosophila*
- 1029 *melanogaster* populations. *Genome Res.* Cold Spring Harbor Laboratory Press;
- 1030 2005;15: 790–799. doi:10.1101/gr.3541005
- 1031 16. Ometto L, Glinka S, De Lorenzo D, Stephan W. Inferring the effects of
- 1032 demography and selection on *Drosophila melanogaster* populations from a
- 1033 chromosome-wide scan of DNA variation. *Mol Biol Evol.* Nature Publishing Group;
- 1034 2005;22: 2119–2130. doi:10.1093/molbev/msi207
- 1035 17. Hernandez RD, Hubisz MJ, Wheeler DA, Smith DG, Ferguson B, Rogers J, et al.
- 1036 Demographic histories and patterns of linkage disequilibrium in Chinese and
- 1037 Indian rhesus macaques. *Science.* 2007;316: 240–3.
- 1038 doi:10.1126/science.1140462
- 1039 18. Ramachandran S, Deshpande O, Roseman CC, Rosenberg N a, Feldman MW,
- 1040 Cavalli-Sforza LL. Support from the relationship of genetic and geographic
- 1041 distance in human populations for a serial founder effect originating in Africa. *Proc*
- 1042 *Natl Acad Sci U S A.* 2005;102: 15942–15947. doi:10.1073/pnas.0507611102
- 1043 19. Henn BM, Cavalli-Sforza LL, Feldman MW. The great human expansion. *Proc*
- 1044 *Natl Acad Sci U S A.* 2012;109: 17758–64. doi:10.1073/pnas.1212380109
- 1045 20. Charlesworth B. Fundamental concepts in genetics: effective population size and
- 1046 patterns of molecular evolution and variation. *Nat Rev Genet.* 2009;10: 195–205.
- 1047 doi:10.1038/nrg2526
- 1048 21. Charlesworth D. Balancing selection and its effects on sequences in nearby
- 1049 genome regions. *PLoS Genet.* Benjamin/Cummings; 2006;2: 379–384.
- 1050 doi:10.1371/journal.pgen.0020064
- 1051 22. Maynar Smith J, Haigh J. The hitch-hiking effect of a favourable gene. *Genet Res.*
- 1052 1974;23: 23–35. doi:10.1017/S0016672308009579
- 1053 23. Charlesworth B, Morgan MT, Charlesworth D. The effect of deleterious mutations
- 1054 on neutral molecular variation. *Genetics.* 1993;134: 1289–303. Available:
- 1055 <http://www.ncbi.nlm.nih.gov/pubmed/8375663>
- 1056 24. Kim Y, Stephan W. Joint effects of genetic hitchhiking and background selection

- 1057 on neutral variation. *Genetics*. 2000;155: 1415–1427. doi:drosophila-  
1058 melanogaster; deleterious mutations; recombination; polymorphism; rates;  
1059 population; evolution; variance; linkage; locus
- 1060 25. Begun DJ, Aquadro CF. Levels of naturally occurring DNA polymorphism  
1061 correlate with recombination rates in *D. melanogaster*. *Nature*. Nature Publishing  
1062 Group; 1992;356: 519–520. doi:10.1038/356519a0
- 1063 26. Charlesworth B. Background selection and patterns of genetic diversity in  
1064 *Drosophila melanogaster*. *Genet Res*. 1996;68: 131–149.  
1065 doi:10.1017/S0016672300034029
- 1066 27. Andolfatto P. Hitchhiking effects of recurrent beneficial amino acid substitutions in  
1067 the *Drosophila melanogaster* genome. *Genome Res*. Cold Spring Harbor  
1068 Laboratory Press; 2007;17: 1755–1762. doi:10.1101/gr.6691007
- 1069 28. Sella G, Petrov DA, Przeworski M, Andolfatto P. Pervasive natural selection in the  
1070 *Drosophila* genome? [Internet]. Nachman MW, editor. *PLoS Genetics*. Plenum;  
1071 2009. p. e1000495. doi:10.1371/journal.pgen.1000495
- 1072 29. Comeron JM. Background Selection as Baseline for Nucleotide Variation across  
1073 the *Drosophila* Genome. Begun DJ, editor. *PLoS Genet*. 2014;10: e1004434.  
1074 doi:10.1371/journal.pgen.1004434
- 1075 30. Elyashiv E, Sattath S, Hu TT, Strutsovsky A, McVicker G, Andolfatto P, et al. A  
1076 Genomic Map of the Effects of Linked Selection in *Drosophila*. Barton NH, editor.  
1077 *PLoS Genet*. Public Library of Science; 2016;12: e1006130.  
1078 doi:10.1371/journal.pgen.1006130
- 1079 31. Flowers JM, Molina J, Rubinstein S, Huang P, Schaal BA, Purugganan MD.  
1080 Natural selection in gene-dense regions shapes the genomic pattern of  
1081 polymorphism in wild and domesticated rice. *Mol Biol Evol*. Oxford University  
1082 Press; 2012;29: 675–687. doi:10.1093/molbev/msr225
- 1083 32. Xu X, Liu X, Ge S, Jensen JJDJJDJ, Hu F, Li X, et al. Resequencing 50  
1084 accessions of cultivated and wild rice yields markers for identifying agronomically  
1085 important genes. *Nat Biotechnol*. 2012;30: 105–11. doi:10.1038/nbt.2050
- 1086 33. Andersen EC, Gerke JP, Shapiro JA, Crissman JR, Ghosh R, Bloom JS, et al.  
1087 Chromosome-scale selective sweeps shape *Caenorhabditis elegans* genomic  
1088 diversity. *Nat Genet*. 2012;44: 285–90. doi:10.1038/ng.1050
- 1089 34. Cutter AD, Payseur BA. Selection at linked sites in the partial selfer  
1090 *Caenorhabditis elegans*. *Mol Biol Evol*. 2003;20: 665–673.  
1091 doi:10.1093/molbev/msg072
- 1092 35. Reed FA, Akey JM, Aquadro CF. Fitting background-selection predictions to  
1093 levels of nucleotide variation and divergence along the human autosomes.  
1094 *Genome Res*. 2005;15: 1211–1221. doi:10.1101/gr.3413205
- 1095 36. Voight BF, Kudaravalli S, Wen X, Pritchard JK. A map of recent positive selection  
1096 in the human genome. Hurst L, editor. *PLoS Biol*. Public Library of Science;  
1097 2006;4: 0446–0458. doi:10.1371/journal.pbio.0040072
- 1098 37. Cai JJ, Macpherson JM, Sella G, Petrov DA. Pervasive hitchhiking at coding and  
1099 regulatory sites in humans. *PLoS Genet*. 2009;5: e1000336.  
1100 doi:10.1371/journal.pgen.1000336
- 1101 38. Hernandez RD, Kelley JL, Elyashiv E, Melton SC, Auton A, McVean G, et al.  
1102 Classic Selective Sweeps Were Rare in Recent Human Evolution. *Science* (80- ).

- 1103 2011;331: 920–924. doi:10.1126/science.1198878
- 1104 39. Lohmueller KE, Albrechtsen A, Li Y, Kim SY, Korneliussen T, Vinckenbosch N, et
- 1105 al. Natural selection affects multiple aspects of genetic variation at putatively
- 1106 neutral sites across the human genome. *PLoS Genet.* 2011;7: e1002326.
- 1107 doi:10.1371/journal.pgen.1002326
- 1108 40. Alves I, Šrámková Hanulová A, Foll M, Excoffier L. Genomic data reveal a
- 1109 complex making of humans [Internet]. Schierup MH, editor. *PLoS Genetics.* Public
- 1110 Library of Science; 2012. p. e1002837. doi:10.1371/journal.pgen.1002837
- 1111 41. Granka JM, Henn BM, Gignoux CR, Kidd JM, Bustamante CD, Feldman MW.
- 1112 Limited evidence for classic selective sweeps in African populations. *Genetics.*
- 1113 2012;192: 1049–1064. doi:10.1534/genetics.112.144071
- 1114 42. Enard D, Messer PW, Petrov DA. Genome-wide signals of positive selection in
- 1115 human evolution. *Genome Res.* Cold Spring Harbor Laboratory Press; 2014;24:
- 1116 885–895. doi:10.1101/gr.164822.113
- 1117 43. Bank C, Ewing GB, Ferrer-Admettla A, Foll M, Jensen JD. Thinking too positive?
- 1118 Revisiting current methods of population genetic selection inference. *Trends*
- 1119 *Genet.* Elsevier Ltd; 2014;30: 540–546. doi:10.1016/j.tig.2014.09.010
- 1120 44. Corbett-Detig RB, Hartl DL, Sackton TB. Natural Selection Constrains Neutral
- 1121 Diversity across A Wide Range of Species. Barton NH, editor. *PLoS Biol.*
- 1122 Springer; 2015;13: e1002112. doi:10.1371/journal.pbio.1002112
- 1123 45. Zeng K. A coalescent model of background selection with recombination,
- 1124 demography and variation in selection coefficients. *Heredity (Edinb).* Nature
- 1125 Publishing Group; 2013;110: 363–71. doi:10.1038/hdy.2012.102
- 1126 46. Nicolaisen LE, Desai MM. Distortions in Genealogies due to Purifying Selection
- 1127 and Recombination. *Genetics.* 2013;195: 221–230.
- 1128 doi:10.1534/genetics.113.152983
- 1129 47. Pennings PS, Kryazhimskiy S, Wakeley J. Loss and Recovery of Genetic
- 1130 Diversity in Adapting Populations of HIV. Fraser C, editor. *PLoS Genet.* Public
- 1131 Library of Science; 2014;10: e1004000. doi:10.1371/journal.pgen.1004000
- 1132 48. Brandvain Y, Wright SI. The Limits of Natural Selection in a Nonequilibrium World.
- 1133 *Trends Genet.* Elsevier Ltd; 2016;32: 201–210. doi:10.1016/j.tig.2016.01.004
- 1134 49. Koch E, Novembre J. A Temporal Perspective on the Interplay of Demography
- 1135 and Selection on Deleterious Variation in Humans. *G3 (Bethesda).* 2017;7:
- 1136 g3.117.039651. doi:10.1534/g3.117.039651
- 1137 50. Lohmueller KE, Indap AR, Schmidt S, Boyko AR, Hernandez RD, Hubisz MJ, et
- 1138 al. Proportionally more deleterious genetic variation in European than in African
- 1139 populations. *Nature.* 2008;451: 994–997. doi:10.1038/nature06611
- 1140 51. Simons YB, Turchin MC, Pritchard JK, Sella G. The deleterious mutation load is
- 1141 insensitive to recent population history. *Nat Genet.* 2014;46: 220–4.
- 1142 doi:10.1038/ng.2896
- 1143 52. Do R, Balick D, Li H, Adzhubei I, Sunyaev S, Reich D. No evidence that selection
- 1144 has been less effective at removing deleterious mutations in Europeans than in
- 1145 Africans. *Nat Genet.* 2015;47: 126–131. doi:10.1038/ng.3186
- 1146 53. Nordborg M, Charlesworth B, Charlesworth D. The effect of recombination on
- 1147 background selection. *Genet Res.* 1996;67: 159–74.
- 1148 doi:10.1017/S0016672300033619

- 1149 54. Moreno-Estrada A, Gignoux CR, Fernández-López JC, Zakharia F, Sikora M,  
1150 Contreras A V, et al. The genetics of Mexico recapitulates Native American  
1151 substructure and affects biomedical traits. *Science* (80- ). 2014;344: 1280–5.  
1152 doi:10.1126/science.1251688
- 1153 55. Hey J. On the number of new world founders: A population genetic portrait of the  
1154 peopling of the Americas. Clark AG, editor. *PLoS Biol.* Springer; 2005;3: 0965–  
1155 0975. doi:10.1371/journal.pbio.0030193
- 1156 56. Bhatia G, Patterson N, Sankararaman S, Price AL. Estimating and interpreting  
1157 FST: The impact of rare variants. *Genome Res.* 2013;23: 1514–1521.  
1158 doi:10.1101/gr.154831.113
- 1159 57. Keinan A, Reich D. Human population differentiation is strongly correlated with  
1160 local recombination rate. Begun DJ, editor. *PLoS Genet.* Public Library of  
1161 Science; 2010;6: e1000886. doi:10.1371/journal.pgen.1000886
- 1162 58. Willing EM, Dreyer C, van Oosterhout C. Estimates of genetic differentiation  
1163 measured by fst do not necessarily require large sample sizes when using many  
1164 snp markers. *PLoS One.* 2012;7: 1–7. doi:10.1371/journal.pone.0042649
- 1165 59. Messer PW, Petrov DA. Frequent adaptation and the McDonald-Kreitman test.  
1166 *Proc Natl Acad Sci U S A.* 2013;110: 8615–20. doi:10.1073/pnas.1220835110
- 1167 60. Ewing GB, Jensen JD. The consequences of not accounting for background  
1168 selection in demographic inference. *Mol Ecol.* Wiley-Blackwell; 2016;25: 135–141.  
1169 doi:10.1111/mec.13390
- 1170 61. Gravel S, Henn BM, Gutenkunst RN, Indap AR, Marth GT, Clark AG, et al.  
1171 Demographic history and rare allele sharing among human populations. *Proc Natl*  
1172 *Acad Sci.* 2011;108: 11983–11988. doi:10.1073/pnas.1019276108
- 1173 62. Tennessen JA, Bigham AW, O'Connor TD, Fu W, Kenny EE, Gravel S, et al.  
1174 Evolution and Functional Impact of Rare Coding Variation from Deep Sequencing  
1175 of Human Exomes. *Science* (80- ). 2012;337: 64–69.  
1176 doi:10.1126/science.1219240
- 1177 63. Phung TN, Huber CD, Lohmueller KE. Determining the Effect of Natural Selection  
1178 on Linked Neutral Divergence across Species. Akey JM, editor. *PLoS Genet.* W.  
1179 H. Freeman; 2016;12: e1006199. doi:10.1371/journal.pgen.1006199
- 1180 64. Burgess R, Yang Z. Estimation of hominoid ancestral population sizes under  
1181 Bayesian coalescent models incorporating mutation rate variation and sequencing  
1182 errors. *Mol Biol Evol.* Oxford University Press; 2008;25: 1979–1994.  
1183 doi:10.1093/molbev/msn148
- 1184 65. Mouse Genome Sequencing Consortium MGS, Waterston RH, Lindblad-Toh K,  
1185 Birney E, Rogers J, Abril JF, et al. Initial sequencing and comparative analysis of  
1186 the mouse genome. *Nature.* 2002;420: 520–62. doi:10.1038/nature01262
- 1187 66. Charlesworth B, Nordborg M, Charlesworth D. The effects of local selection,  
1188 balanced polymorphism and background selection on equilibrium patterns of  
1189 genetic diversity in subdivided populations. *Genet Res.* 1997;70: 155–174.  
1190 doi:10.1017/S0016672397002954
- 1191 67. Hu XS, He F. Background selection and population differentiation. *J Theor Biol.*  
1192 2005;235: 207–219. doi:10.1016/j.jtbi.2005.01.004
- 1193 68. Coop G, Pickrell JK, Novembre J, Kudaravalli S, Li J, Absher D, et al. The role of  
1194 geography in human adaptation. Schierup MH, editor. *PLoS Genet.* R Foundation



- 1195 for Statistical Computing; 2009;5: e1000500. doi:10.1371/journal.pgen.1000500  
1196 69. Bhatia G, Patterson N, Pasaniuc B, Zaitlen N, Genovese G, Pollack S. Genome-  
1197 Wide Comparison of African-Ancestry Populations from CARE and Other Cohorts  
1198 Reveals Signals of Natural Selection. 2011;89: 368–381.  
1199 doi:10.1016/j.ajhg.2011.07.025.  
1200 70. Eyre-Walker A, Keightley PD. Estimating the rate of adaptive molecular evolution  
1201 in the presence of slightly deleterious mutations and population size change. *Mol*  
1202 *Biol Evol.* 2009;26: 2097–2108. doi:10.1093/molbev/msp119  
1203 71. Galtier N. Adaptive Protein Evolution in Animals and the Effective Population Size  
1204 Hypothesis. Schierup MH, editor. *PLoS Genet.* Oxford University Press; 2016;12:  
1205 e1005774. doi:10.1371/journal.pgen.1005774  
1206 72. Garud NR, Messer PW, Buzbas EO, Petrov DA. Recent selective sweeps in North  
1207 American *Drosophila melanogaster* show signatures of soft sweeps. Copenhaver  
1208 GP, editor. *PLoS Genet.* Wiley; 2015;11: e1005004.  
1209 doi:10.1371/journal.pgen.1005004  
1210 73. Szpiech ZA, Hernandez RD. Selscan: An efficient multithreaded program to  
1211 perform EHH-based scans for positive selection. *Mol Biol Evol.* 2014;31: 2824–  
1212 2827. doi:10.1093/molbev/msu211  
1213 74. Fu W, Gittelman RM, Bamshad MJ, Akey JM. Characteristics of neutral and  
1214 deleterious protein-coding variation among individuals and populations. *Am J*  
1215 *Hum Genet.* Springer-Verlag, New York; 2014;95: 421–436.  
1216 doi:10.1016/j.ajhg.2014.09.006  
1217 75. Henn BM, Botigué LR, Peischl S, Dupanloup I, Lipatov M, Maples BK, et al.  
1218 Distance from sub-Saharan Africa predicts mutational load in diverse human  
1219 genomes. *Proc Natl Acad Sci. National Academy of Sciences*; 2015;113:  
1220 201510805. doi:10.1073/pnas.1510805112  
1221 76. Casals F, Hodgkinson A, Hussin J, Idaghdour Y, Bruat V, de Maillard T, et al.  
1222 Whole-Exome Sequencing Reveals a Rapid Change in the Frequency of Rare  
1223 Functional Variants in a Founding Population of Humans. Williams SM, editor.  
1224 *PLoS Genet.* Public Library of Science; 2013;9: e1003815.  
1225 doi:10.1371/journal.pgen.1003815  
1226 77. Lim ET, Würtz P, Havulinna AS, Palta P, Tukiainen T, Rehnström K, et al.  
1227 Distribution and Medical Impact of Loss-of-Function Variants in the Finnish  
1228 Founder Population. Cutler D, editor. *PLoS Genet.* Public Library of Science;  
1229 2014;10: e1004494. doi:10.1371/journal.pgen.1004494  
1230 78. Cao J, Schneeberger K, Ossowski S, Günther T, Bender S, Fitz J, et al. Whole-  
1231 genome sequencing of multiple *Arabidopsis thaliana* populations. *Nat Genet.*  
1232 2011;43: 956–963. doi:10.1038/ng.911  
1233 79. Renaut S, Rieseberg LH. The accumulation of deleterious mutations as a  
1234 consequence of domestication and improvement in sunflowers and other  
1235 compositae crops. *Mol Biol Evol.* Oxford University Press; 2015;32: 2273–2283.  
1236 doi:10.1093/molbev/msv106  
1237 80. Balick DJ, Do R, Cassa CA, Reich D, Sunyaev SR. Dominance of Deleterious  
1238 Alleles Controls the Response to a Population Bottleneck. Coop G, editor. *PLoS*  
1239 *Genet.* Cambridge University Press; 2015;11: e1005436.  
1240 doi:10.1371/journal.pgen.1005436

- 1241 81. Simons YB, Sella G. The impact of recent population history on the deleterious  
1242 mutation load in humans and close evolutionary relatives [Internet]. *Current*  
1243 *Opinion in Genetics and Development*. 2016. pp. 150–158.  
1244 doi:10.1016/j.gde.2016.09.006
- 1245 82. Gravel S. When is selection effective? *Genetics*. 2016;203: 451–462.  
1246 doi:10.1534/genetics.115.184630
- 1247 83. Charlesworth B. The Effects of Deleterious Mutations on Evolution at Linked  
1248 Sites. *Genetics*. 2012;190: 5–22. doi:10.1534/genetics.111.134288
- 1249 84. Coventry A, Bull-Otterson LM, Liu X, Clark AG, Maxwell TJ, Crosby J, et al. Deep  
1250 resequencing reveals excess rare recent variants consistent with explosive  
1251 population growth. *Nat Commun. Nature Publishing Group*; 2010;1: 131.  
1252 doi:10.1038/ncomms1130
- 1253 85. Keinan A, Clark AG. Recent explosive human population growth has resulted in  
1254 an excess of rare genetic variants. *Science (80- )*. 2012;336: 740–3.  
1255 doi:10.1126/science.1217283
- 1256 86. Nelson MR, Wegmann D, Ehm MG, Kessner D, St. Jean P, Verzilli C, et al. An  
1257 Abundance of Rare Functional Variants in 202 Drug Target Genes Sequenced in  
1258 14,002 People. *Science (80- )*. 2012;337: 100–104. doi:10.1126/science.1217876
- 1259 87. Gazave E, Ma L, Chang D, Coventry A, Gao F, Muzny D, et al. Neutral genomic  
1260 regions refine models of recent rapid human population growth. *Proc Natl Acad*  
1261 *Sci U S A*. 2014;111: 757–62. doi:10.1073/pnas.1310398110
- 1262 88. Maher MC, Uricchio LH, Torgerson DG, Hernandez RD. Population Genetics of  
1263 Rare Variants and Complex Diseases. *Hum Hered. NIH Public Access*; 2012;74:  
1264 118–128. doi:10.1159/000346826
- 1265 89. Fu W, O'Connor TD, Jun G, Kang HM, Abecasis G, Leal SM, et al. Analysis of  
1266 6,515 exomes reveals the recent origin of most human protein-coding variants.  
1267 *Nature. NIH Public Access*; 2013;493: 216–220. doi:10.1038/nature11690
- 1268 90. Fay JC, Wu CI. A human population bottleneck can account for the discordance  
1269 between patterns of mitochondrial versus nuclear DNA variation. *Mol Biol Evol*.  
1270 1999;16: 1003–1005. doi:10.1093/oxfordjournals.molbev.a026175
- 1271 91. Wall JD, Andolfatto P, Przeworski M. Testing Models of Selection and  
1272 Demography in *Drosophila simulans*. *Genetics*. 2002;162. Available:  
1273 <http://www.genetics.org/content/162/1/203>
- 1274 92. Pool JE, Nielsen R. Population size changes reshape genomic patterns of  
1275 diversity. *Evolution (N Y)*. 2007;61: 3001–3006. doi:10.1111/j.1558-  
1276 5646.2007.00238.x
- 1277 93. Gottipati S, Arbiza L, Siepel A, Clark AG, Keinan A. Analyses of X-linked and  
1278 autosomal genetic variation in population-scale whole genome sequencing. *Nat*  
1279 *Genet. NIH Public Access*; 2011;43: 741–743. doi:10.1038/ng.877
- 1280 94. Arbiza L, Gottipati S, Siepel A, Keinan A. Contrasting X-linked and autosomal  
1281 diversity across 14 human populations. *Am J Hum Genet*. 2014;94: 827–844.  
1282 doi:10.1016/j.ajhg.2014.04.011
- 1283 95. Wilson Sayres MA, Lohmueller KE, Nielsen R. Natural Selection Reduced  
1284 Diversity on Human Y Chromosomes. *PLoS Genet*. 2014;10.  
1285 doi:10.1371/journal.pgen.1004064
- 1286 96. Hammer MF, Woerner AE, Mendez FL, Watkins JC, Cox MP, Wall JD. The ratio

- 1287 of human X chromosome to autosome diversity is positively correlated with  
1288 genetic distance from genes. *Nat Genet.* 2010;42: 830–1. doi:10.1038/ng.651
- 1289 97. Leffler EM, Bullaughey K, Matute DR, Meyer WK, Ségurel L, Venkat A, et al.  
1290 Revisiting an Old Riddle: What Determines Genetic Diversity Levels within  
1291 Species? *PLoS Biol. Public Library of Science*; 2012;10: e1001388.  
1292 doi:10.1371/journal.pbio.1001388
- 1293 98. Vucetich JA, Waite TA, Nunney L. Fluctuating Population Size and the Ratio of  
1294 Effective to Census Population Size Published by : Society for the Study of  
1295 Evolution Stable URL : <http://www.jstor.org/stable/2411022>. *Source Evol.* 2008;51:  
1296 2017–2021. doi:10.2307/2411022
- 1297 99. Coop G. Does linked selection explain the narrow range of genetic diversity  
1298 across species? [Internet]. *bioRxiv.* 2016. doi:10.1101/042598
- 1299 100. Lewontin RC. The Genetic Basis of Evolutionary Change [Internet]. *The Genetic*  
1300 *Basis of Evolutionary Change.* New York and London: Columbia University Press;  
1301 1974. doi:10.1136/ard.2010.140574
- 1302 101. Nam K, Munch K, Mailund T, Nater A, Greminger MP, Krützen M, et al. Evidence  
1303 that the rate of strong selective sweeps increases with population size in the great  
1304 apes. *Proc Natl Acad Sci. National Academy of Sciences*; 2016;114: 1–6.  
1305 doi:10.1073/pnas.1605660114
- 1306 102. Prado-Martinez J, Sudmant PH, Kidd JM, Li H, Kelley JL, Lorente-Galdos B, et al.  
1307 Great ape genetic diversity and population history. *Nature. Nature Research*;  
1308 2013;499: 471–475. doi:10.1038/nature12228
- 1309 103. McManus KF, Kelley JL, Song S, Veeramah KR, Woerner AE, Stevison LS, et al.  
1310 Inference of gorilla demographic and selective history from whole-genome  
1311 sequence data. *Mol Biol Evol. Cambridge University Press, Cambridge*; 2015;32:  
1312 600–612. doi:10.1093/molbev/msu394
- 1313 104. Nater A, Greminger MP, Arora N, Van Schaik CP, Goossens B, Singleton I, et al.  
1314 Reconstructing the demographic history of orang-utans using Approximate  
1315 Bayesian Computation. *Mol Ecol.* 2015;24: 310–327. doi:10.1111/mec.13027
- 1316 105. Kuhlwilm M, de Manuel M, Nater A, Greminger MP, Krützen M, Marques-Bonet T.  
1317 Evolution and demography of the great apes. *Curr Opin Genet Dev.* 2016;41:  
1318 124–129. doi:10.1016/j.gde.2016.09.005
- 1319 106. Uricchio LH, Torres R, Witte JS, Hernandez RD. Population genetic simulations of  
1320 complex phenotypes with implications for rare variant association tests. *Genet*  
1321 *Epidemiol.* 2015;39: 35–44. doi:10.1002/gepi.21866
- 1322 107. Uricchio LH, Zaitlen NA, Ye CJ, Witte JS, Hernandez RD. Selection and explosive  
1323 growth alter genetic architecture and hamper the detection of causal rare variants.  
1324 *Genome Res. Cold Spring Harbor Laboratory Press*; 2016;26: 863–873.  
1325 doi:10.1101/gr.202440.115
- 1326 108. Danecek P, Auton A, Abecasis G, Albers CA, Banks E, DePristo MA, et al. The  
1327 variant call format and VCFtools. *Bioinformatics.* 2011;27: 2156–2158.  
1328 doi:10.1093/bioinformatics/btr330
- 1329 109. Kidd J, Sharpton T, Bobo D, Norman P, Martin A, Carpenter M, et al. Exome  
1330 capture from saliva produces high quality genomic and metagenomic data. *BMC*  
1331 *Genomics. BioMed Central*; 2014;15: 262. doi:10.1186/1471-2164-15-262
- 1332 110. Kim HL, Ratan A, Perry GH, Montenegro A, Miller W, Schuster SC. Khoisan

- 1333 hunter-gatherers have been the largest population throughout most of modern-  
1334 human demographic history. *Nat Commun.* 2014;5: 5692.  
1335 doi:10.1038/ncomms6692
- 1336 111. Pollard KS, Hubisz MJ, Rosenbloom KR, Siepel A. Detection of nonneutral  
1337 substitution rates on mammalian phylogenies. *Genome Res.* Cold Spring Harbor  
1338 Laboratory Press; 2010;20: 110–121. doi:10.1101/gr.097857.109
- 1339 112. Siepel A, Bejerano G, Pedersen JS, Hinrichs AS, Hou M, Rosenbloom K, et al.  
1340 Evolutionarily conserved elements in vertebrate, insect, worm, and yeast  
1341 genomes. *Genome Res.* 2005;15: 1034–1050. doi:10.1101/gr.3715005
- 1342 113. Consortium ENCODEP, Bernstein BE, Birney E, Dunham I, Green ED, Gunter C,  
1343 et al. An integrated encyclopedia of DNA elements in the human genome. *Nature.*  
1344 2012;489: 57–74. doi:10.1038/nature11247
- 1345 114. Bailey JA, Yavor AM, Massa HF, Trask BJ, Eichler EE. Segmental duplications:  
1346 organization and impact within the current human genome project assembly.  
1347 *Genome Res.* 2001;11: 1005–17. doi:10.1101/gr.187101
- 1348 115. Capra JA, Hubisz MJ, Kostka D, Pollard KS, Siepel A. A Model-Based Analysis of  
1349 GC-Biased Gene Conversion in the Human and Chimpanzee Genomes. Coop G,  
1350 editor. *PLoS Genet.* Public Library of Science; 2013;9: e1003684.  
1351 doi:10.1371/journal.pgen.1003684
- 1352 116. Frazer KA, Ballinger DG, Cox DR, Hinds DA, Stuve LL, Gibbs RA, et al. A second  
1353 generation human haplotype map of over 3.1 million SNPs. *Nature.* 2007;449:  
1354 851–61. doi:10.1038/nature06258
- 1355 117. Pratto F, Brick K, Khil P, Smagulova F, Petukhova G V, Camerini-Otero RD. DNA  
1356 recombination. Recombination initiation maps of individual human genomes.  
1357 *Science.* 2014;346: 1256442. doi:10.1126/science.1256442
- 1358 118. Wang K, Li M, Hakonarson H. ANNOVAR: Functional annotation of genetic  
1359 variants from high-throughput sequencing data. *Nucleic Acids Res.* Oxford  
1360 University Press; 2010;38: e164–e164. doi:10.1093/nar/gkq603
- 1361 119. Hernandez RD, Williamson SH, Zhu L, Bustamante CD. Context-dependent  
1362 mutation rates may cause spurious signatures of a fixation bias favoring higher  
1363 GC-content in humans. *Mol Biol Evol.* 2007;24: 2196–2202.  
1364 doi:10.1093/molbev/msm149
- 1365 120. Schrider DR, Shanku AG, Kern AD. Effects of linked selective sweeps on  
1366 demographic inference and model selection. *Genetics.* 2016;204: 1207–1223.  
1367 doi:10.1534/genetics.116.190223
- 1368 121. Palamara PF, Francioli LC, Wilton PR, Genovese G, Gusev A, Finucane HK, et  
1369 al. Leveraging Distant Relatedness to Quantify Human Mutation and Gene-  
1370 Conversion Rates. *Am J Hum Genet.* 2015;97: 775–789.  
1371 doi:10.1016/j.ajhg.2015.10.006
- 1372 122. Hernandez RD. A flexible forward simulator for populations subject to selection  
1373 and demography. *Bioinformatics.* 2008;24: 2786–2787.  
1374 doi:10.1093/bioinformatics/btn522
- 1375 123. Torgerson DG, Boyko AR, Hernandez RD, Indap A, Hu X, White TJ, et al.  
1376 Evolutionary processes acting on candidate cis-regulatory regions in humans  
1377 inferred from patterns of polymorphism and divergence. *PLoS Genet.* 2009;5:  
1378 doi:10.1371/journal.pgen.1000592



- 1379 124. Maples BK, Gravel S, Kenny EE, Bustamante CD. RFMix: A discriminative  
1380 modeling approach for rapid and robust local-ancestry inference. *Am J Hum*  
1381 *Genet.* The American Society of Human Genetics; 2013;93: 278–288.  
1382 doi:10.1016/j.ajhg.2013.06.020
- 1383 125. O’Connell J, Gurdasani D, Delaneau O, Pirastu N, Ulivi S, Cocca M, et al. A  
1384 General Approach for Haplotype Phasing across the Full Spectrum of  
1385 Relatedness. *PLoS Genet.* Public Library of Science; 2014;10: e1004234.  
1386 doi:10.1371/journal.pgen.1004234
- 1387 126. Mao X, Bigham AW, Mei R, Gutierrez G, Weiss KM, Brutsaert TD, et al. A  
1388 genomewide admixture mapping panel for Hispanic/Latino populations. *Am J*  
1389 *Hum Genet.* 2007;80: 1171–1178. doi:10.1086/518564
- 1390 127. Hudson RR, Slatkin M, Maddison WP. Estimation of levels of gene flow from DNA  
1391 sequence data. *Genetics.* 1992;589: 583–589. Available:  
1392 <http://www.genetics.org/content/132/2/583.short>  
1393  
1394

## 1395 **Supporting information**

### 1396 **S1 Supporting information.**

1397 **Fig S1. Inference models inferred from TGP CG weak BGS neutral regions and**  
1398 **coding four-fold degenerate sites.** Solid lines are the inference results from running  
1399 dadi on 53 YRI (African), 64 CEU (European), and 62 CHS (East Asian) TGP CG sam-  
1400 ples (projected down to 106 chromosomes during inference procedure) across neutral  
1401 regions in the weakest 1% BGS bin ( $B \geq 0.994$ ). Broken lines represent the inference  
1402 results using the same CG samples, but with sequence data only from coding four-fold  
1403 degenerate synonymous sites.

1404 **Fig S2. Diversity for TGP non-admixed populations while controlling for GC-**  
1405 **biased gene conversion and recombination hotspots.** (A) Normalized diversity  
1406 ( $\pi$ /divergence) measured across the strongest 1% BGS bin. (B) Normalized diversity  
1407 measured across the weakest 1% BGS bin. (C) Relative diversity: the ratio of normal-  
1408 ized diversity for the strongest 1% BGS bin to normalized diversity for the weakest 1%

1409 BGS bin ( $\pi/\pi_0$ ). Error bars represent  $\pm 1$  SEM calculated from 1,000 bootstrapped da-  
1410 taset.

1411 **Fig S3. Diversity for TGP non-admixed populations without normalizing by diver-**

1412 **gence with Rhesus macaque.** (A) Diversity ( $\pi$ ) measured across the strongest 1%

1413 BGS bin. (B) Diversity measured across the weakest 1% BGS bin. (C) Relative diversi-

1414 ty: the ratio of diversity for the strongest 1% BGS bin to diversity for the weakest 1%

1415 BGS bin ( $\pi/\pi_0$ ). Error bars represent  $\pm 1$  SEM calculated from 1,000 bootstrapped da-

1416 taset.

1417 **Fig S4. Diversity for TGP continental groups while controlling for GC-biased gene**

1418 **conversion and recombination hotspots.** (A) Normalized diversity ( $\pi/\text{divergence}$ )

1419 measured across the strongest 1%, 5%, 10% and 25% BGS bins and the weakest 1%

1420 BGS bin (as classified by  $B$ ). (B) Relative diversity ( $\pi/\pi_0$ ) for the strongest 1%, 5%, 10%,

1421 and 25% BGS bins. Error bars represent  $\pm 1$  SEM calculated from 1,000 bootstrapped

1422 datasets.

1423 **Fig S5. Diversity for TGP continental groups without normalizing by divergence**

1424 **with Rhesus macaque.** (A) Diversity ( $\pi$ ) measured across the strongest 1%, 5%, 10%

1425 and 25% BGS bins and the weakest 1% BGS bin (as classified by  $B$ ). (B) Relative di-

1426 versity ( $\pi/\pi_0$ ) for the strongest 1%, 5%, 10%, and 25% BGS bins. Error bars represent

1427  $\pm 1$  SEM calculated from 1,000 bootstrapped datasets.

1428 **Fig S6.  $F_{ST}$  measured across joint bins of  $B$  and recombination rate for different**

1429 **TGP continental groups.** The left panels of Figures S6 A-E show  $F_{ST}$  measured as a

1430 function of 25 4% quantile recombination rate bins conditional on three 2% quantile  $B$

1431 bins (note log scale of x-axis for recombination rate). The right panels of Figures S6 A-E

1432 show  $F_{ST}$  measured as a function of 25 4% quantile  $B$  bins conditional on three 2%  
1433 quantile recombination rate bins. The following continental group comparisons are  
1434 shown for each plot: (A) African vs. European, (B) African vs. East Asian, (C) European  
1435 vs. South Asian, (D) European vs. East Asian, (E) South Asian vs. East Asian. Smaller  
1436 transparent points and lines show the  $F_{ST}$  estimates and corresponding lines of best fit  
1437 (using linear regression) for each of the pairwise population comparisons within a par-  
1438 ticular pair of continental groups (25 comparisons total). Larger opaque points are mean  
1439  $F_{ST}$  estimates across all pairwise comparisons within a particular pair of continental  
1440 groups (with bold lines showing their corresponding lines of best fit).

1441 **Fig S7. Simulations of diversity and relative diversity under BGS using a human**  
1442 **demographic model without migration.** (A) Inferred demographic model from Com-  
1443 plete Genomics TGP data. The demographic model used for the simulations in Figure  
1444 S7 are identical to those used for Figure 6, except that migration parameters between  
1445 all populations are set to 0. (B) Simulated diversity at neutral sites across populations as  
1446 a function of time under our inferred demographic model without BGS ( $\pi_0$  - dashed col-  
1447 ored lines) and with BGS ( $\pi$  - solid colored lines). (C) Relative diversity ( $\pi/\pi_0$ ) measured  
1448 by taking the ratio of diversity with BGS ( $\pi$ ) to diversity without BGS ( $\pi_0$ ) at each time  
1449 point. Note that the x-axes in all three figures are on the same scale. Time is scaled us-  
1450 ing a human generation time of 25 years per generation. Simulation data was sampled  
1451 every 100 generations.

1452 **Fig S8. Simulations of diversity and relative diversity under BGS using various**  
1453 **values of  $U$ .** Values of  $U$  are provided in the header for each set of plots. Left column  
1454 plots show results of simulations under a demographic model with migration between all

1455 human populations. Right column plots show results of simulations under a demograph-  
1456 ic model with no migration. Colored lines represent different populations though time  
1457 and are identical to those in Figure 6 and Figure S7. The demographic model used is  
1458 also identical to that in Figure 6 (for simulations with migration) and Figure S7 (for simu-  
1459 lations without migration). Simulation data was sampled every 100 generations.

1460

1461 **S2 Appendix. Soft sweep detection and implementation in selscan v1.2.0.**

1462

1463 **Main Figure Legends**

1464 **Fig 1. Normalized diversity and relative diversity for non-admixed populations of**  
1465 **the Thousand Genomes Project (TGP).**

1466 (A) Normalized diversity ( $\pi$ /divergence) measured across the strongest 1% background  
1467 selection (BGS) bin. (B) Normalized diversity measured across the weakest 1% BGS  
1468 bin. (C) Relative diversity: the ratio of normalized diversity for the strongest 1% BGS bin  
1469 to normalized diversity for the weakest 1% BGS bin ( $\pi/\pi_0$ ). BGS bins were classified by  
1470 *B*. TGP population labels are indicated below each bar (see Table S11 in Supporting  
1471 information for population label descriptions), with African populations colored by gold  
1472 shades, European populations colored by blue shades, South Asian populations colored  
1473 by violet shades, and East Asian populations colored by green shades. Error bars rep-  
1474 resent  $\pm 1$  SEM calculated from 1,000 bootstrapped datasets.

1475 **Fig 2. Normalized and relative diversity for Thousand Genomes Project (TGP)**  
1476 **continental groups.**

1477 (A) Normalized diversity ( $\pi$ /divergence) measured across the strongest 1%, 5%, 10%  
1478 and 25% background selection (BGS) bins and the weakest 1% BGS bin (as classified  
1479 by  $B$ ). (B) Relative diversity: the ratio of normalized diversity for each strong BGS bin in  
1480 (A) to normalized diversity for the weakest 1% BGS bin ( $\pi/\pi_0$ ). Error bars represent  $\pm 1$   
1481 SEM calculated from 1,000 bootstrapped datasets.

1482 **Fig 3. Comparing patterns of diversity between local ancestry segments of ad-**  
1483 **mixed samples and continental groups.**

1484 (A) Normalized diversity (heterozygosity/divergence) and (B) Relative diversity: the ratio  
1485 of normalized diversity for each strong BGS bin in (A) to normalized diversity for the  
1486 weakest 1% BGS bin. Local ancestry segments include African, European, and Native  
1487 American ancestries. Continental groups include African, European, and East Asian  
1488 populations. Error bars represent  $\pm 1$  SEM calculated from 1,000 bootstrapped datasets.

1489 **Fig 4.  $F_{ST}$  is correlated with  $B$  but not recombination rate.**

1490 (A)  $F_{ST}$  measured across 2% quantile bins of  $B$ . (B)  $F_{ST}$  measured across 2% quantile  
1491 recombination rate bins. The right panel of Figure 4B displays a narrower range of re-  
1492 combination rates to show detail. Smaller transparent points and lines show the esti-  
1493 mates and corresponding lines of best fit (using linear regression) for  $F_{ST}$  between every  
1494 pairwise population comparison for a particular pair of continental groups (25 pairwise  
1495 comparisons each). Larger opaque points and lines are mean  $F_{ST}$  estimates and lines of  
1496 best fit across all Thousand Genomes Project (TGP) population comparisons between a  
1497 particular pair of continental groups. Error bars represent  $\pm 1$  SEM calculated from 1,000  
1498 bootstrapped datasets.

1499 **Fig 5.  $F_{ST}$  between African (AFR) and South Asian (SASN) populations jointly**  
1500 **across  $B$  and recombination rate.**

1501 (A)  $F_{ST}$  as a function of 25 recombination rate bins (4% quantile bins) conditional on  
1502 three different 2% quantile  $B$  bins (note log scale of x-axis for recombination rate). (B)  
1503  $F_{ST}$  as a function of 25  $B$  bins (4% quantile bins) conditional on three different 2% quan-  
1504 tile recombination rate bins. Smaller transparent points and lines show the  $F_{ST}$  esti-  
1505 mates and corresponding lines of best fit (using linear regression) for each of the pair-  
1506 wise comparisons of AFR vs. SASN Thousand Genomes Project (TGP) populations (25  
1507 comparisons total). Larger opaque points are mean  $F_{ST}$  estimates across all pairwise  
1508 comparisons of AFR vs. SASN TGP populations (with bold lines showing their corre-  
1509 sponding lines of best fit).

1510 **Fig 6. Simulations confirm that demographic events shape the impact of back-**  
1511 **ground selection (BGS).**

1512 (A) Inferred demographic model from Complete Genomics Thousand Genomes Project  
1513 (TGP) data showing population size changes for Africans (AFR), Europeans (EUR), and  
1514 East Asians (EASN) as a function of time that was used for the simulations of BGS. (B)  
1515 Simulated diversity at neutral sites across populations as a function of time under our  
1516 inferred demographic model without BGS ( $\pi_0$  - dashed colored lines) and with BGS ( $\pi$  -  
1517 solid colored lines). (C) Relative diversity ( $\pi/\pi_0$ ) measured by taking the ratio of diversity  
1518 with BGS ( $\pi$ ) to diversity without BGS ( $\pi_0$ ) at each time point. Note that the x-axes in all  
1519 three figures are on the same scale. Time is scaled using a human generation time of  
1520 25 years per generation. Simulation data was sampled every 100 generations.

1521

Figure 1

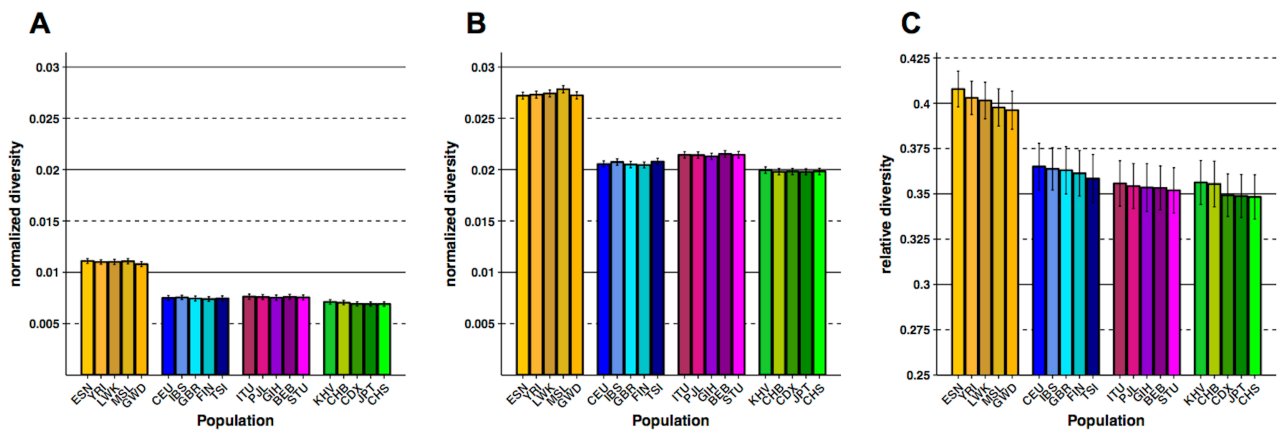

Figure 2

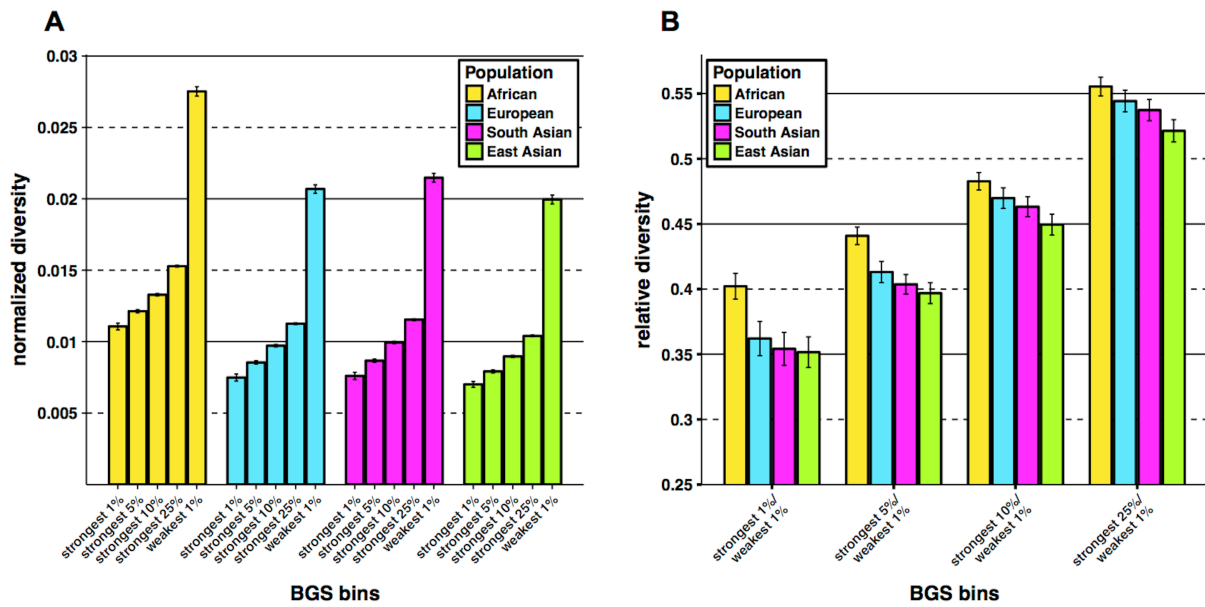



Figure 3

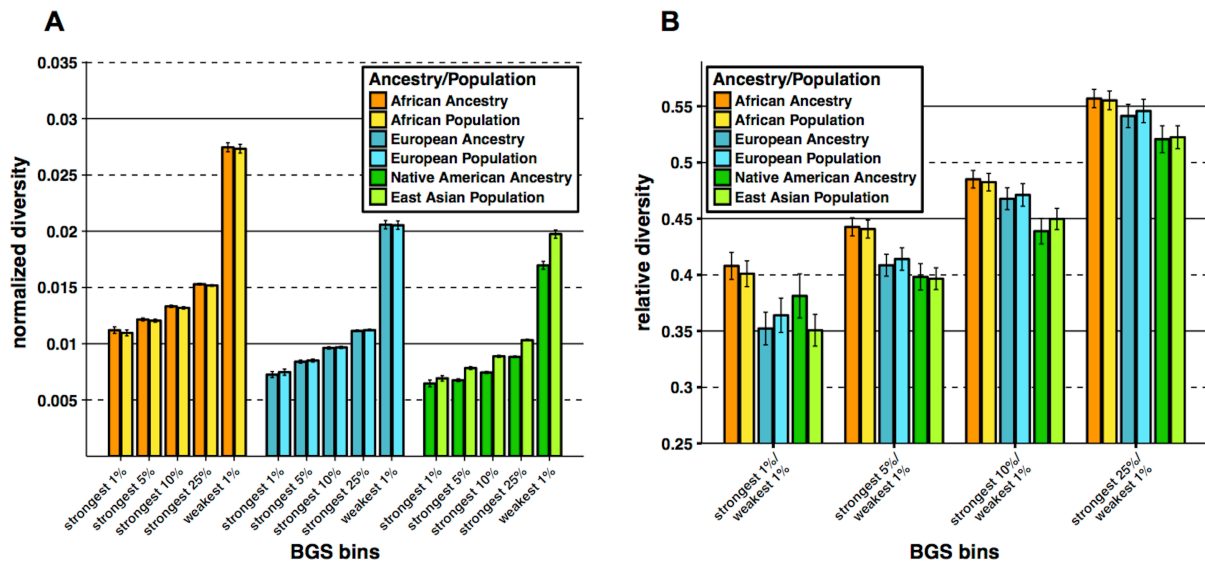

Figure 4

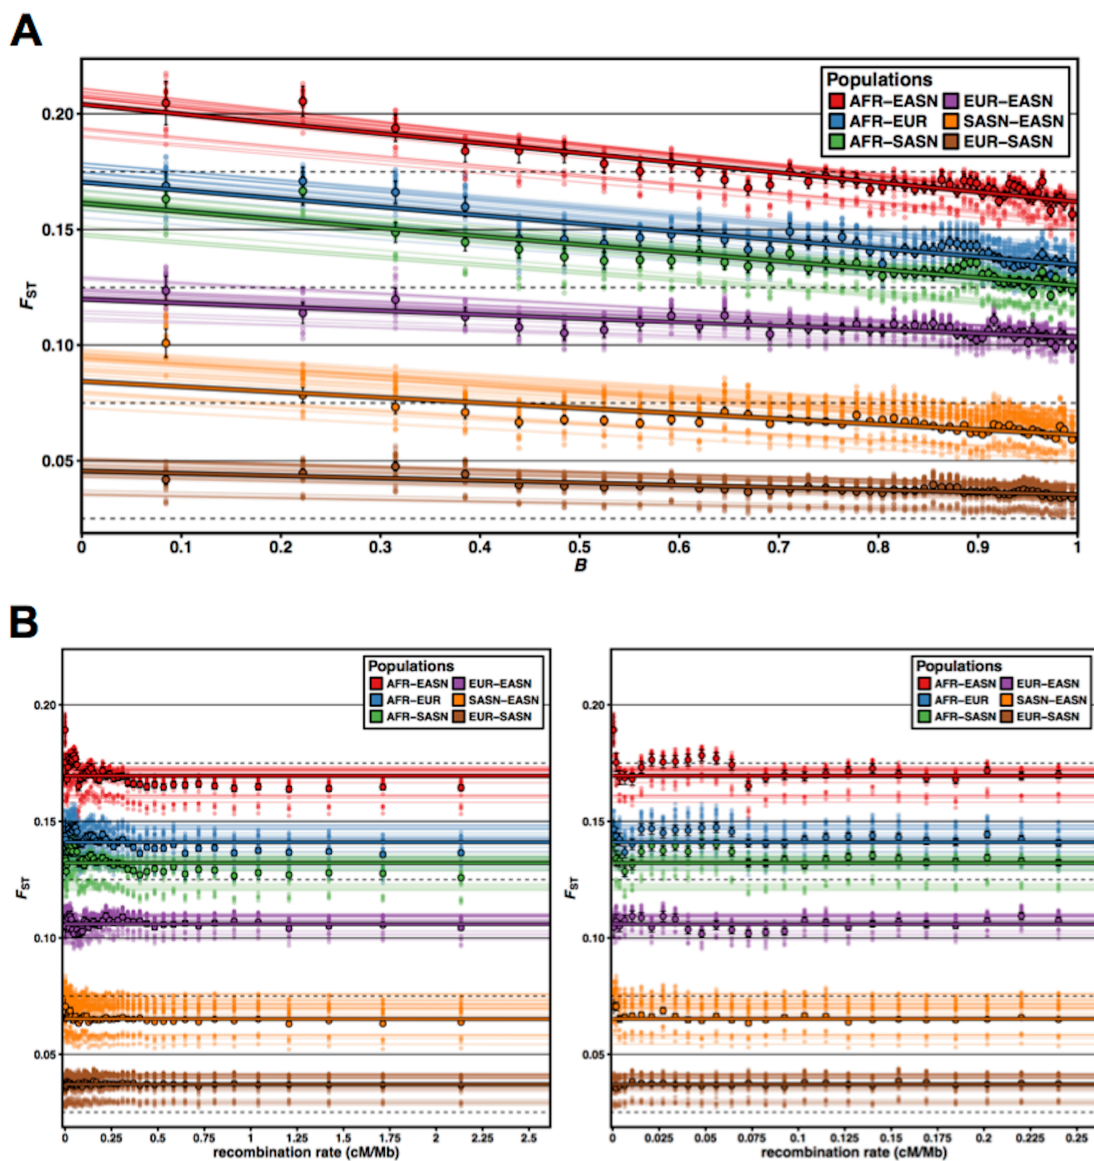

Figure 5

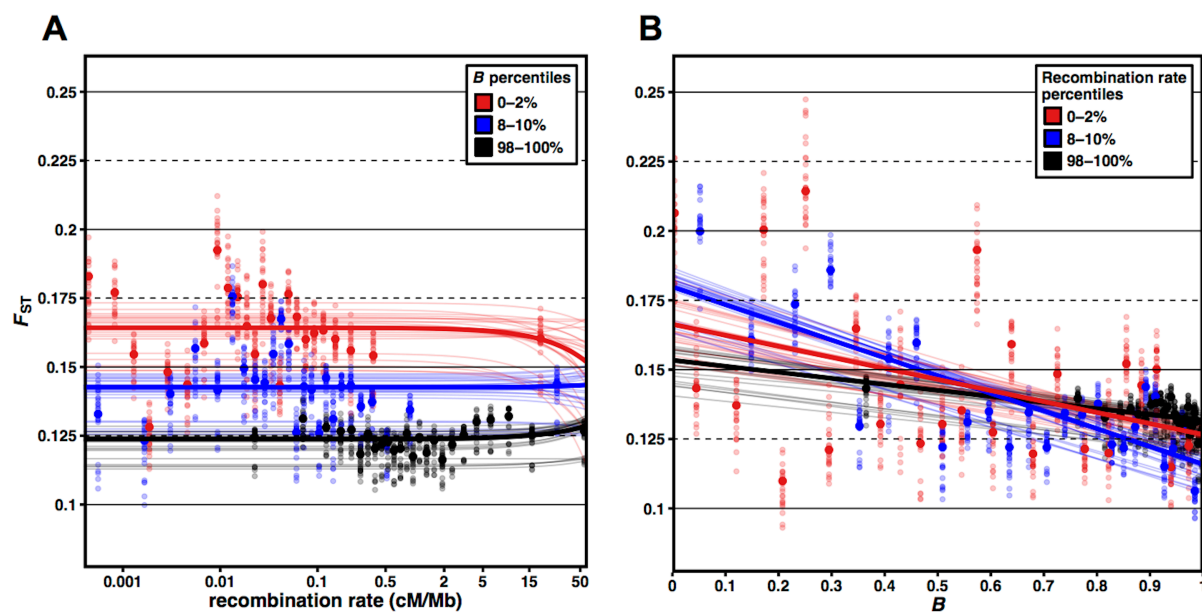

Figure 6

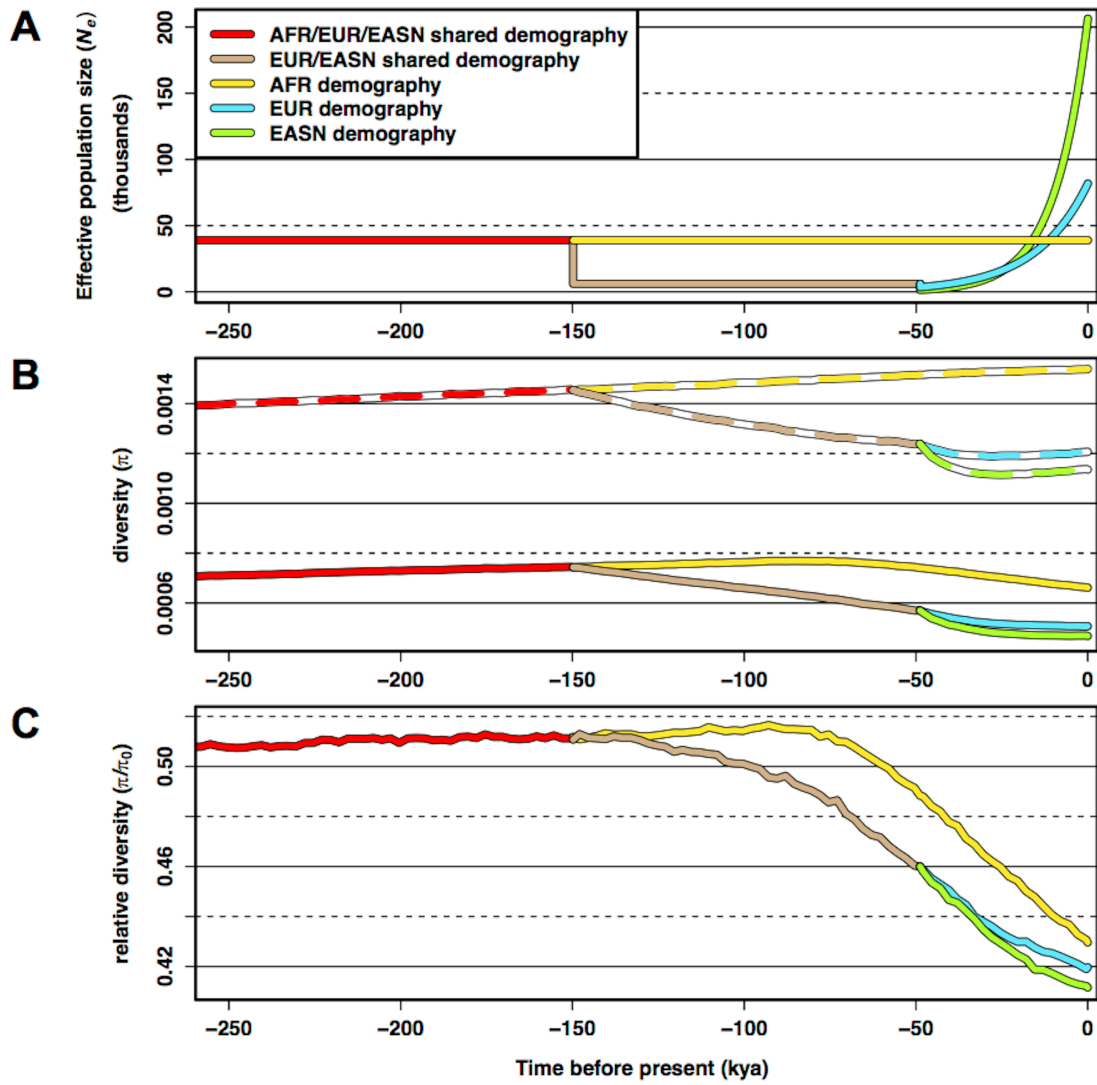

## S1 Supporting information

Table S1

| Parameters                             | $B \geq 0.994$ | four-fold degenerate |
|----------------------------------------|----------------|----------------------|
| $N_{Ancestral}$                        | 18,449         | 17,118               |
| $N_{AFR}$                              | 38,874         | 47,537               |
| $N_{Bott}$                             | 5,946          | 6,408                |
| $N_{EUR0}$                             | 3,413          | 4,331                |
| $N_{EUR}$                              | 81,901         | 100,614              |
| $N_{EASN0}$                            | 1,317          | 1,678                |
| $N_{EASN}$                             | 206,804        | 266,616              |
| $T_{AFR}+T_{Bott}+T_{EUR\_EASN}$ (kya) | 552,939        | 413,337              |
| $T_{Bott}+T_{EUR\_EASN}$ (kya)         | 149,813        | 198,603              |
| $T_{EUR\_EASN}$ (kya)                  | 48,822         | 69,584               |
| $r_{EUR}$ (%)                          | 0.163          | 0.113                |
| $r_{EASN}$ (%)                         | 0.259          | 0.182                |
| $m_{AFR-Bott}$ ( $\times 10^{-5}$ )    | 7.83           | 7.02                 |
| $m_{AFR-EUR}$ ( $\times 10^{-5}$ )     | 0.51           | 0.47                 |
| $m_{AFR-EASN}$ ( $\times 10^{-5}$ )    | 0.13           | 0.18                 |
| $m_{EUR-EASN}$ ( $\times 10^{-5}$ )    | 0.98           | 1.14                 |

**Table S1.** Inferred parameters from running dadi on TGP CG data across neutral regions in the weakest 1% BGS bin ( $B \geq 0.994$ ) and across four-fold degenerate sites. The demographic model inferred is the Out-of-Africa demographic model of Gutenkunst et al. 2009. Time parameters,  $T$ , assume a generation time of 25 years per generation. Growth rates,  $r$ , and migration rates,  $m$ , are per generation. Parameters with subscript, “*Bott*”, represent parameters inferred for the ancestral European and East Asian out-of-Africa bottleneck population. Time parameters with subscript “*EUR\_EASN*” represent the European-East Asian population split.

**Table S3**

| <b>Henn et al. 2015 samples</b> |                        |                   |
|---------------------------------|------------------------|-------------------|
| <b>SampleID</b>                 | <b>Number of Sites</b> | <b>Mean Depth</b> |
| HGDP00991                       | 2,207,845              | 6.96118           |
| HGDP00987                       | 2,229,426              | 7.19132           |
| HGDP01036                       | 2,373,023              | 11.6072           |
| HGDP00992                       | 2,452,509              | 12.1913           |
| HGDP01029                       | 2,415,792              | 12.3526           |
| HGDP01032                       | 2,407,400              | 12.8113           |
| <b>Kidd et al. 2014 samples</b> |                        |                   |
| <b>SampleID</b>                 | <b>Number of Sites</b> | <b>Mean Depth</b> |
| SA1000A                         | 547,527                | 2.56481           |
| SA1025A                         | 2,136,905              | 9.1239            |
| <b>Kim et al. 2014 samples</b>  |                        |                   |
| <b>SampleID</b>                 | <b>Number of Sites</b> | <b>Mean Depth</b> |
| KB2                             | 2,756,225              | 27.5951           |
| NB1                             | 2,599,220              | 28.0148           |
| MD8                             | 2,777,871              | 38.4532           |
| NB8                             | 2,778,198              | 40.1789           |
| KB1                             | 2,757,336              | 50.5629           |

**Table S3.** Number of polymorphic sites and mean depth coverage of 13 Khoisan samples used for SNP ascertainment in calculations of  $F_{ST}$ .

**Table S4**

|                                                | <b>top 1% <i>B</i></b> | <b>top 5% <i>B</i></b> | <b>top 10% <i>B</i></b> | <b>top 25% <i>B</i></b> | <b>bottom 1% <i>B</i></b> |
|------------------------------------------------|------------------------|------------------------|-------------------------|-------------------------|---------------------------|
| <b>filters</b>                                 | 7.59                   | 40.42                  | 87.86                   | 246.59                  | 13.1                      |
| <b>filters + gBGC<br/>and hotspots removal</b> | 7.26                   | 38.68                  | 83.75                   | 231.71                  | 7.94                      |

**Table S4.** Total number of Mb in the human genome passing the set of 13 filters described in Materials and Methods that were used for calculating pairwise genetic diversity ( $\pi$ ) for each quantile of *B*. The bottom row is the total number Mb when including the set of filters to remove regions sensitive to GC-biased gene conversion (gBGC) or sites in recombination hotspots. Additionally, these totals only include those 100 kb regions that had a minimum of 10 kb of divergence information for Rhesus macaque (see Materials and Methods).

**Table S5**

| <b>Ancestry</b> | <b>top 1% <i>B</i></b> | <b>top 5% <i>B</i></b> | <b>top 10% <i>B</i></b> | <b>top 25% <i>B</i></b> | <b>bottom 1% <i>B</i></b> |
|-----------------|------------------------|------------------------|-------------------------|-------------------------|---------------------------|
| African         | 841.97                 | 4471.54                | 9720.15                 | 27333.95                | 1447.04                   |
| European        | 815.74                 | 4296.69                | 9293.04                 | 26034.57                | 1366.26                   |
| Native American | 497.29                 | 2603.12                | 5640.13                 | 15776.71                | 834.46                    |

**Table S5.** Total number of Mb of homozygous ancestry that passed all filters and were used in the analyses of admixed samples in the 6 admixed TGP populations (ACB, ASW, CLM, MXL, PEL, PUR) for each quantile of *B*. Additionally, these totals only include those 100 kb regions that had a minimum of 10 kb of divergence information for Rhesus macaque (see Materials and Methods).



Figure S1

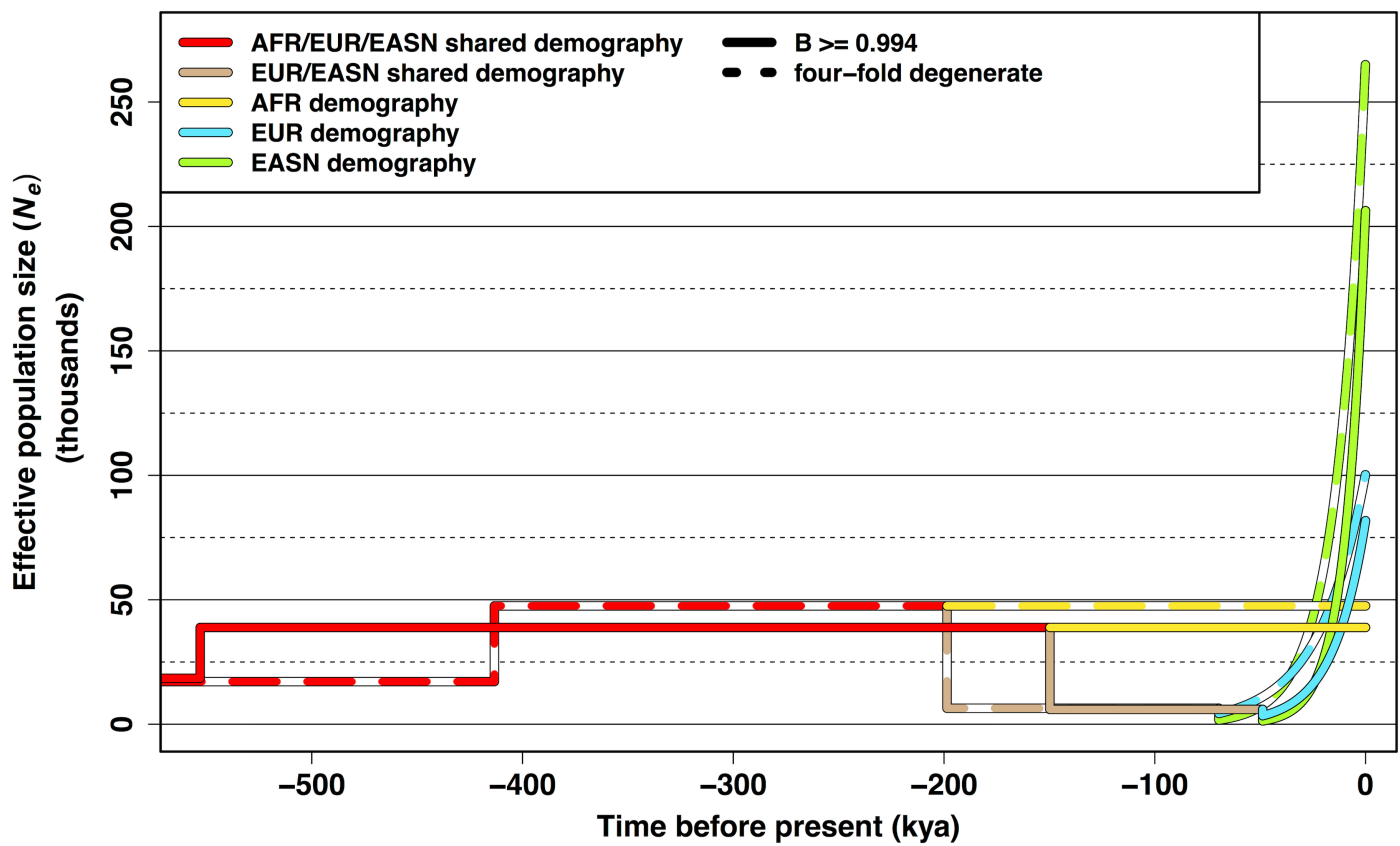

Figure S2

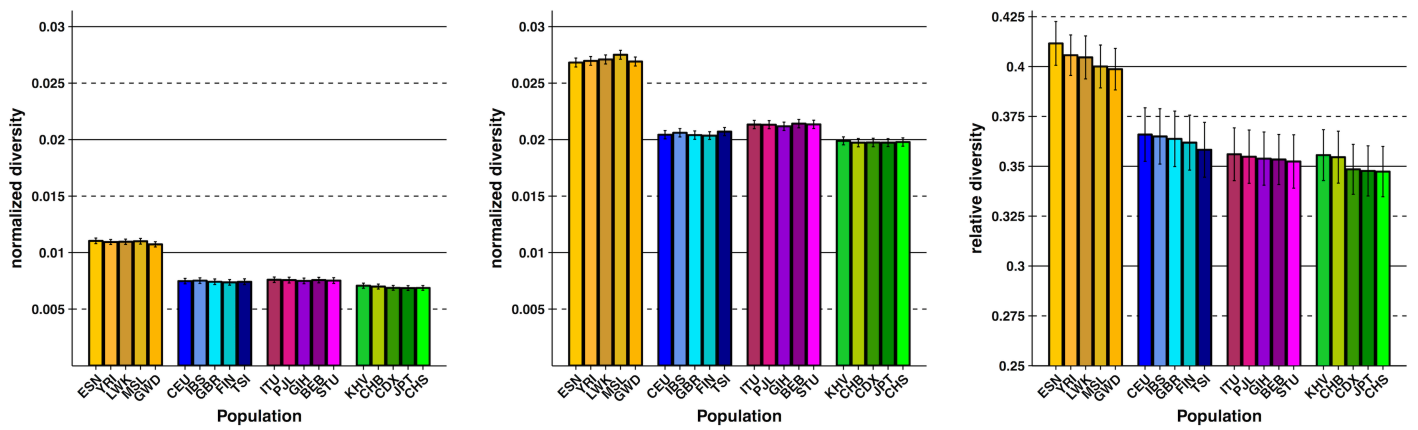

Figure S3

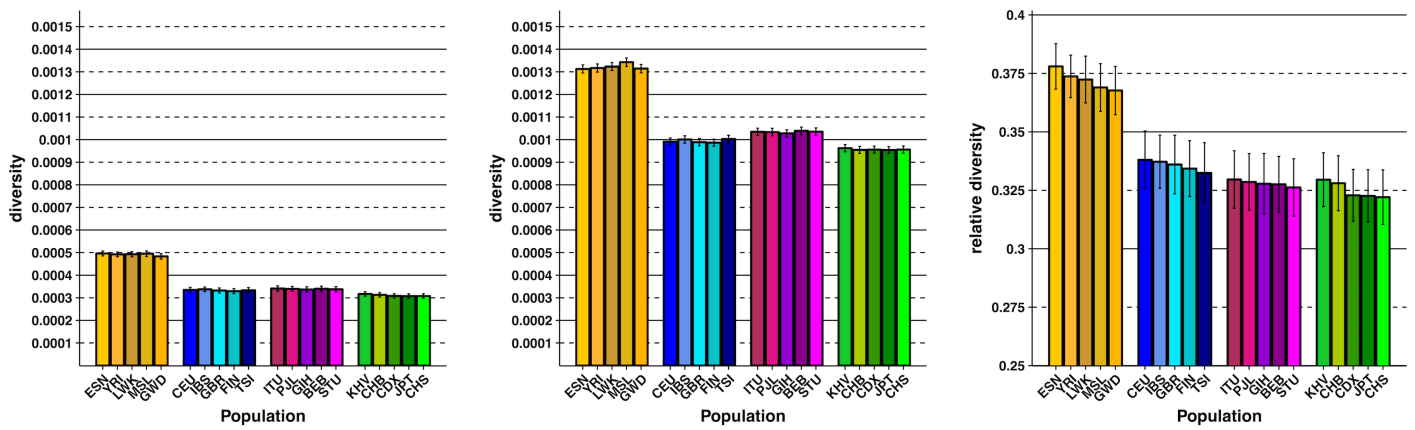

Figure S4

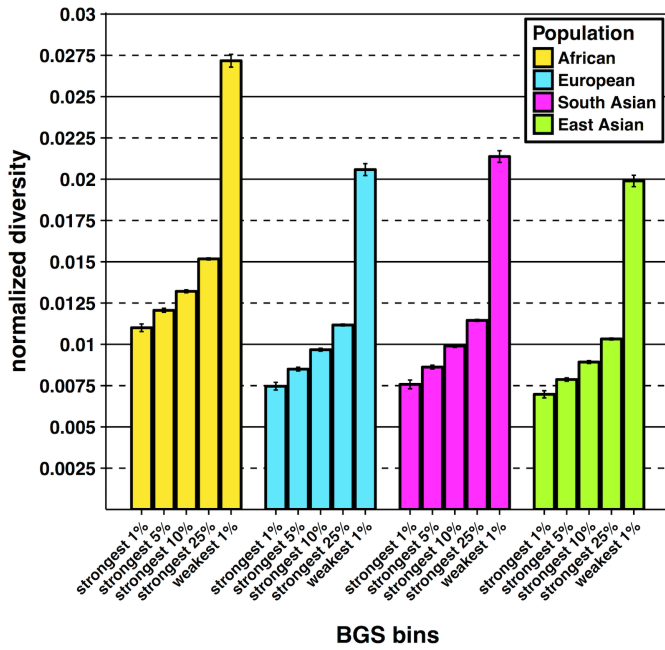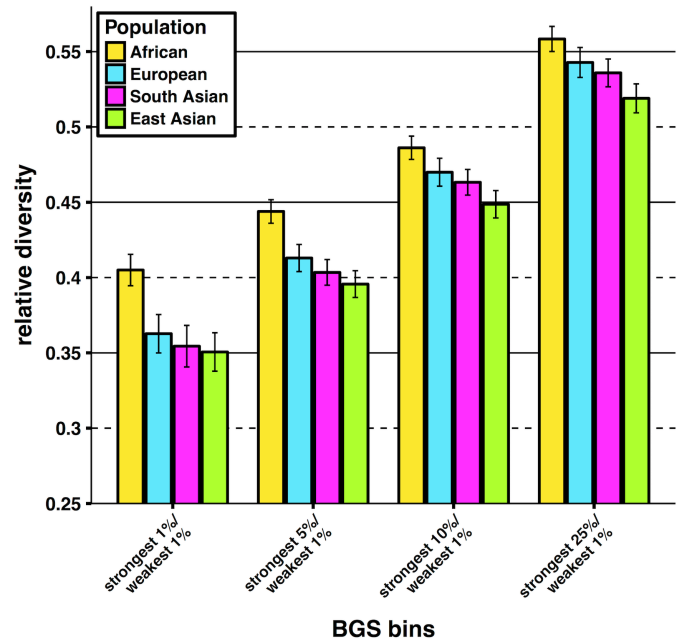

Figure S5

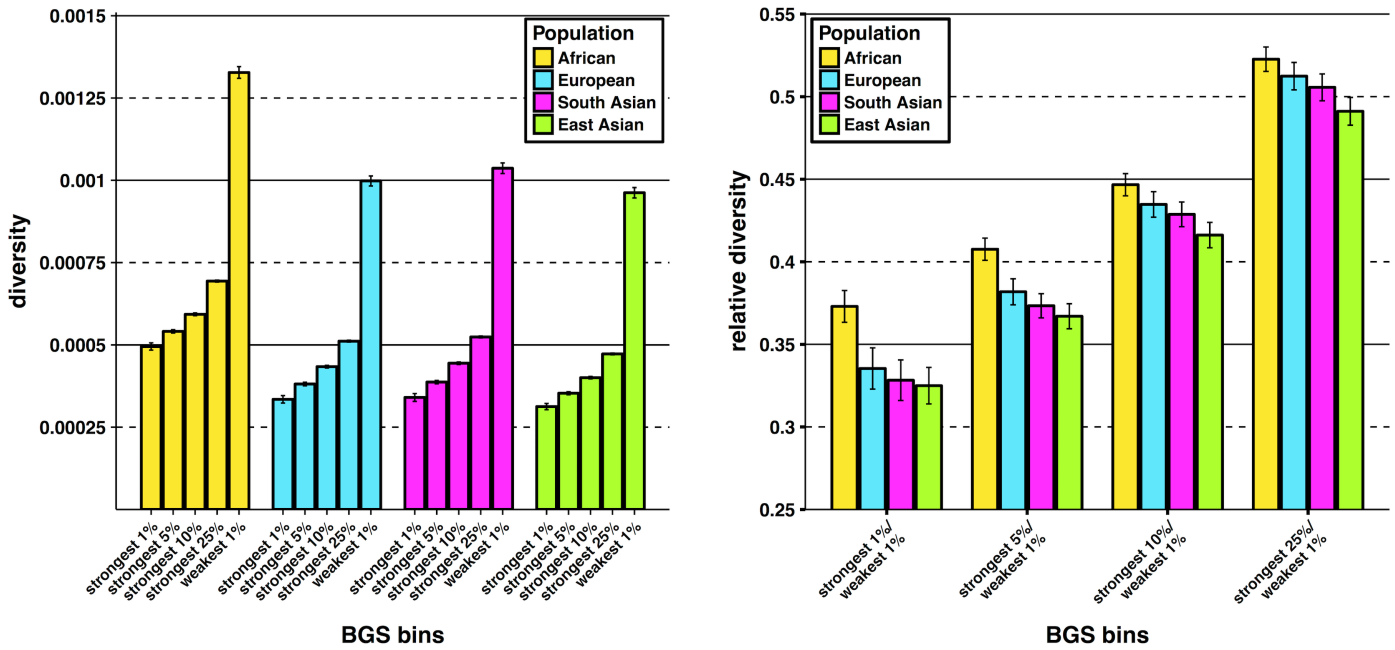

Figure S6

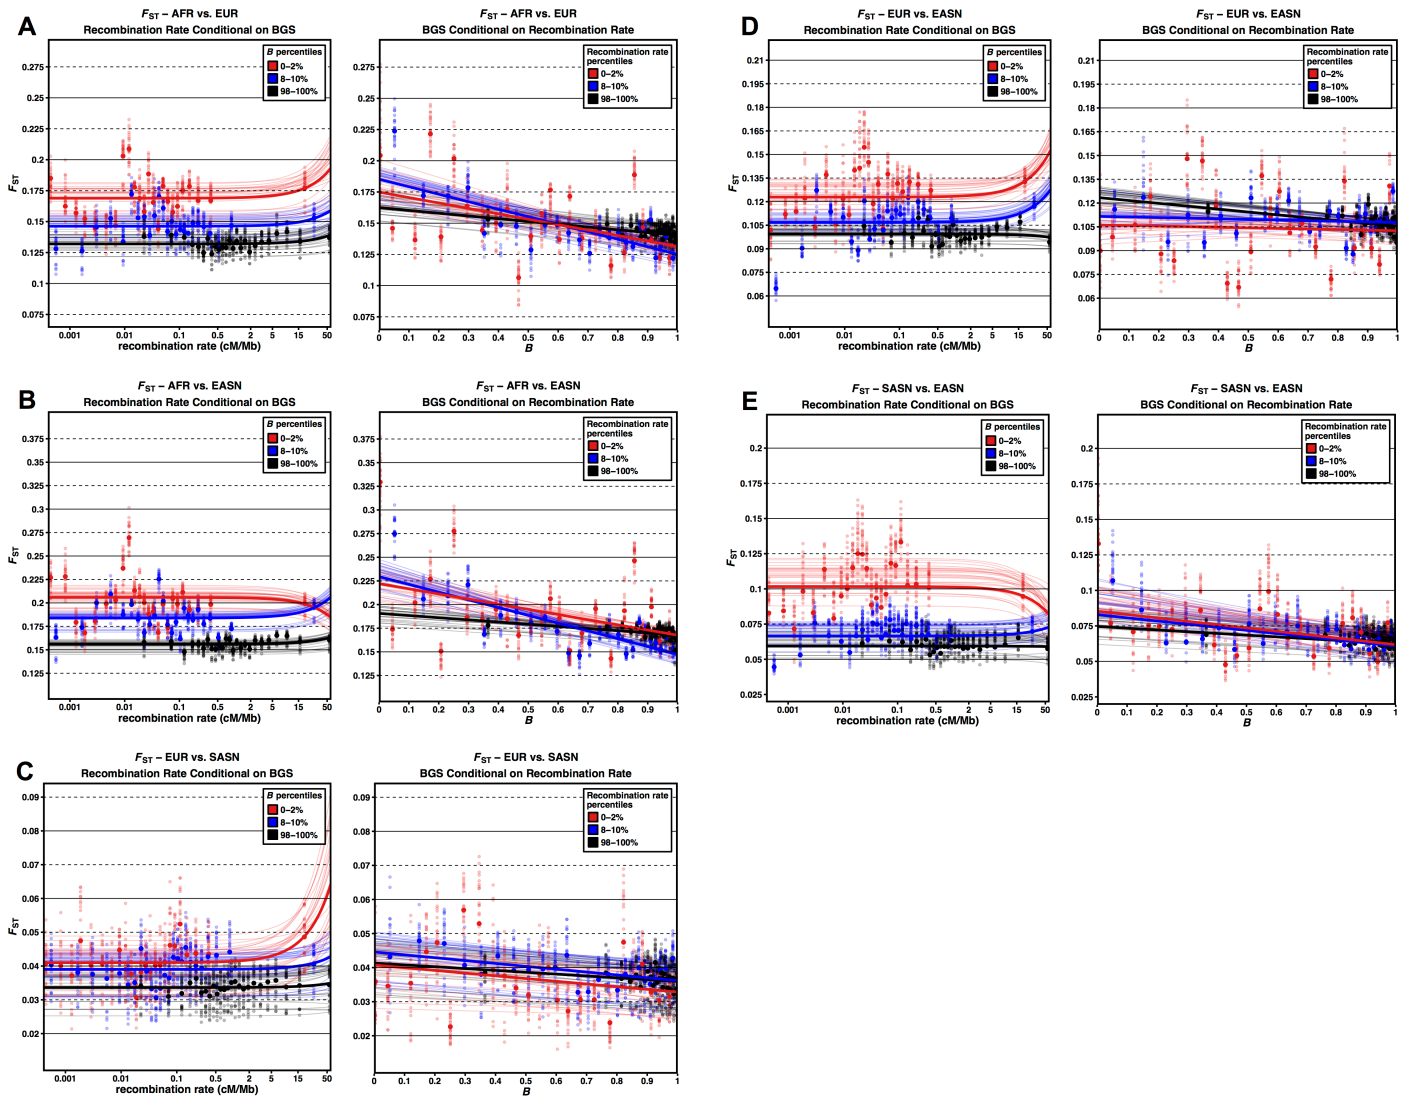

Figure S7

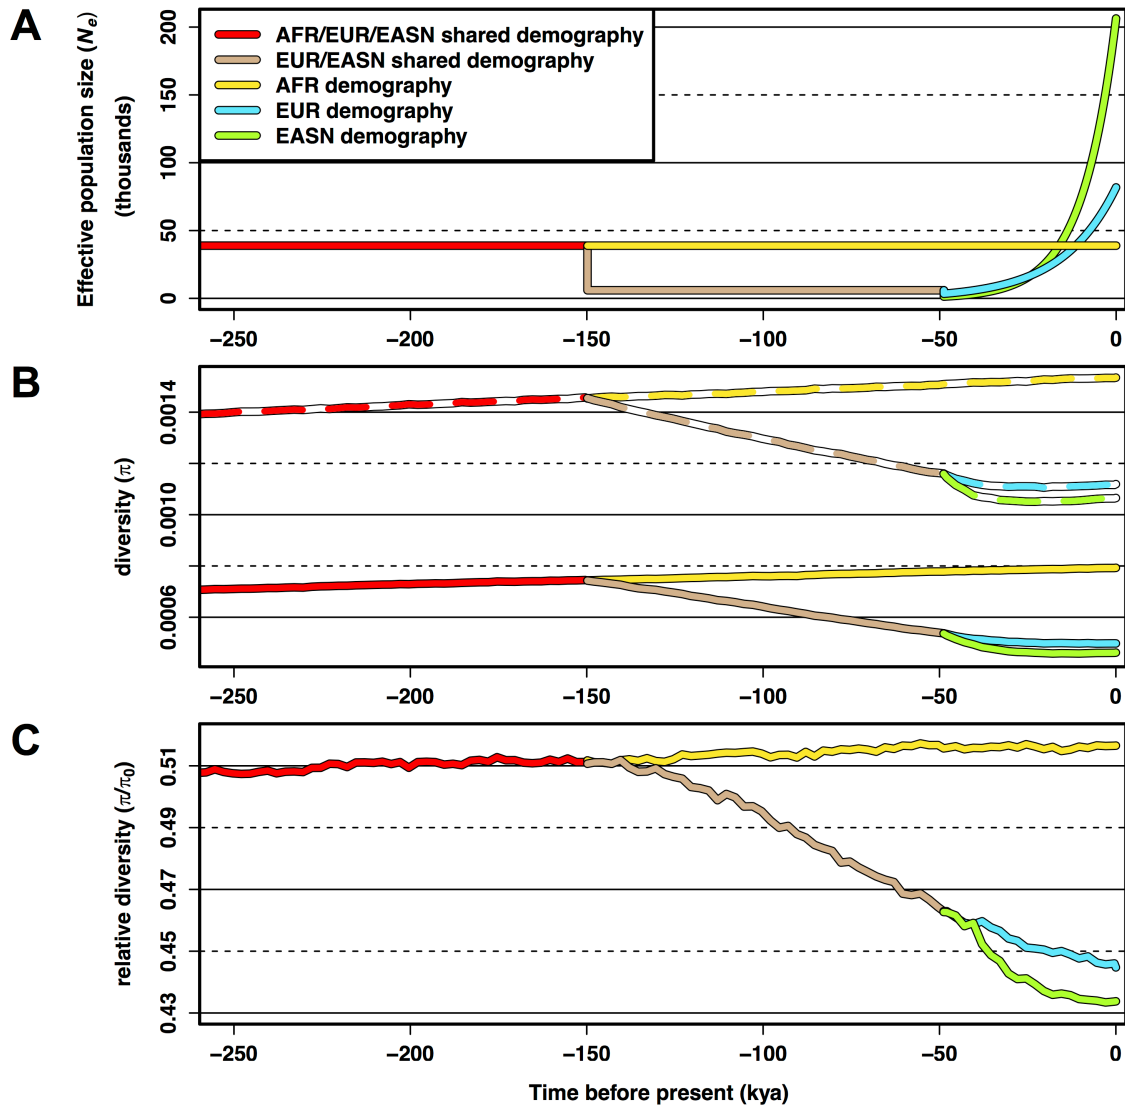

Figure S8

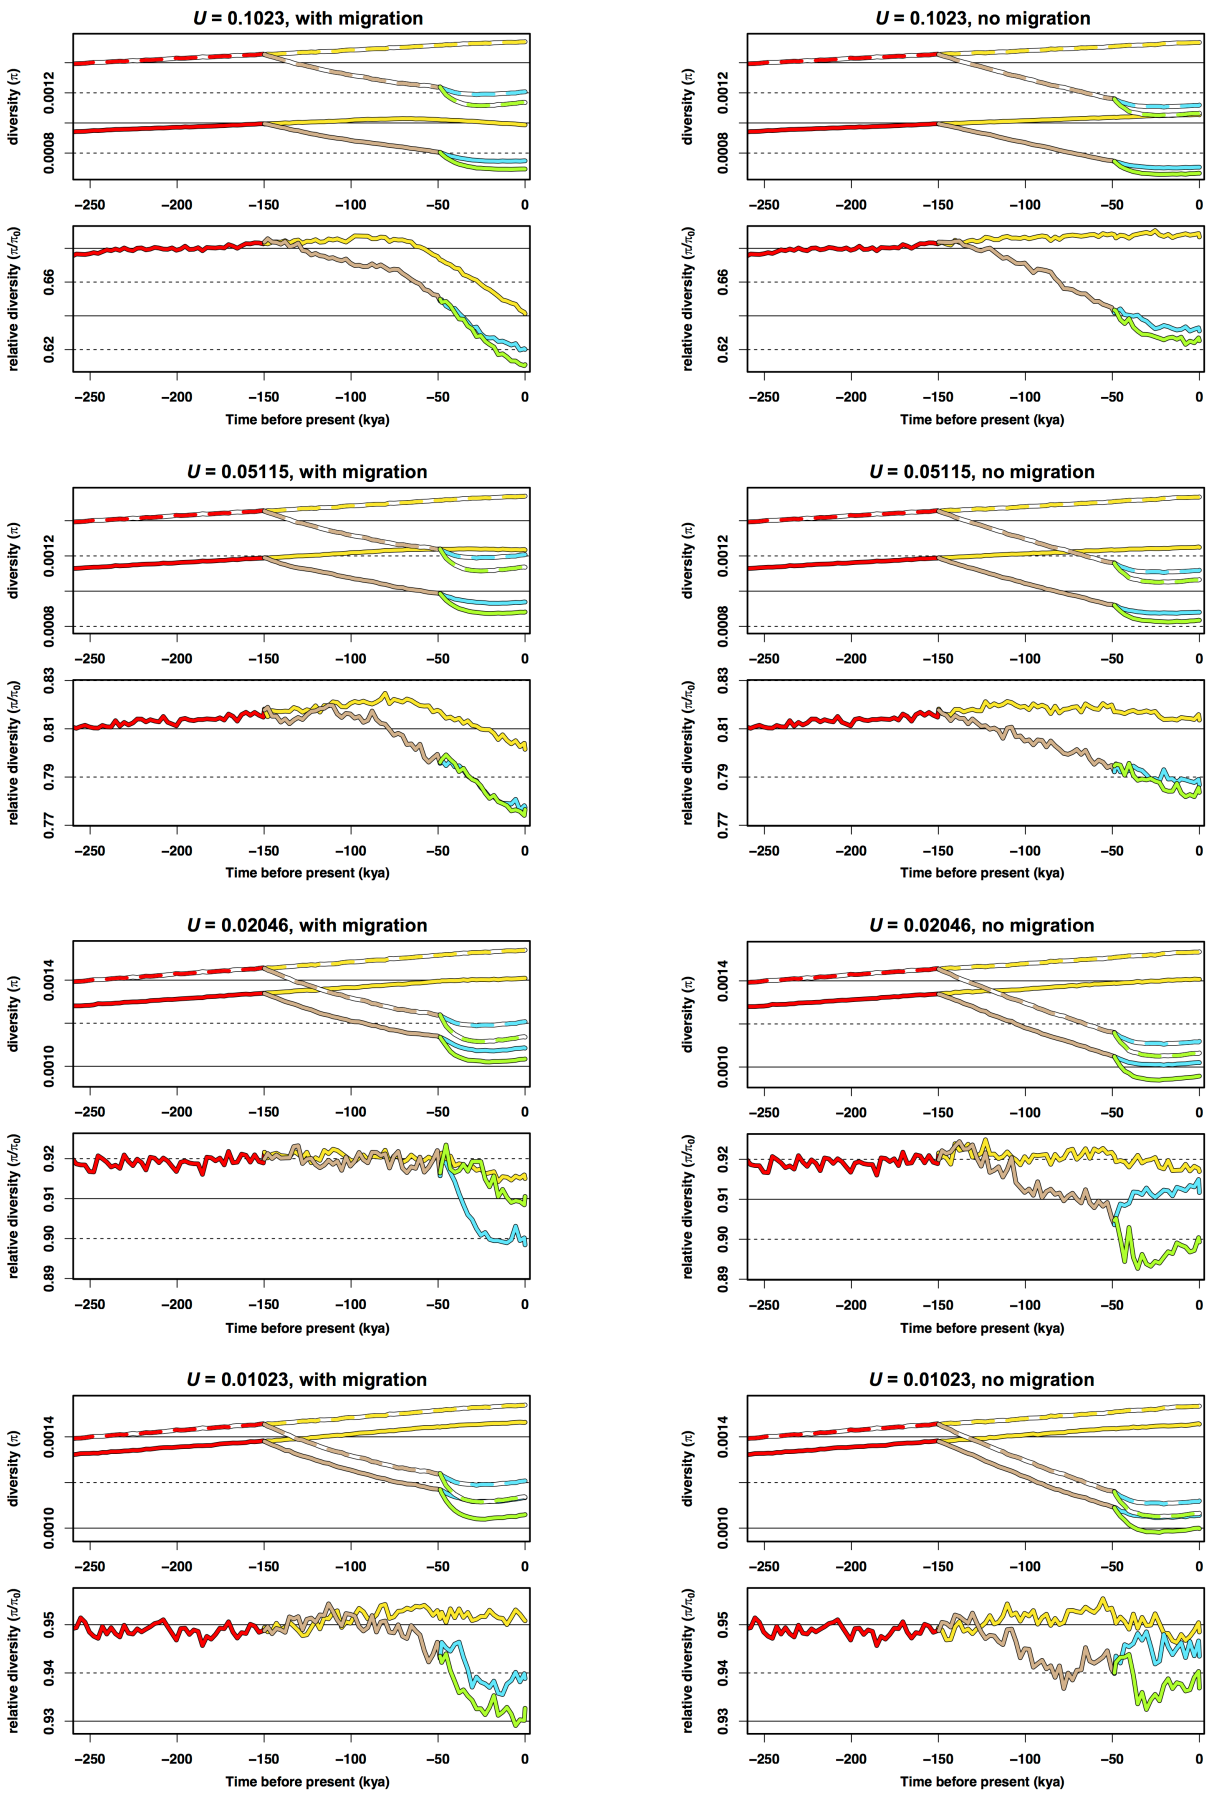



## S2 Appendix. Soft sweep detection and implementation in `selscan v1.2.0`.

### Detecting soft sweeps

Under the model of a soft sweep, there is an increased chance of multiple distinct haplotypes sweeping to high frequency in a population. Garud et al. [1] developed a window-based statistic ( $H12$ ) with good power to detect this process, and here we adapt  $H12$  into an integrated haplotype homozygosity framework [2–4]. We call this new statistic  $iHH12$ . The general principle of these statistics is to combine the top two most frequent haplotypes into a single haplotype class to avoid the reduced power that  $iHS$  has when the adaptive allele segregates on more than one haplotype background. We calculate  $iHH12$  as follows.

Following the notation of Szpiech and Hernandez [5] in a sample of  $n$  chromosomes we let  $\mathcal{C}$  be the set of all possible distinct haplotypes at the locus  $x_0$ .  $\mathcal{C}(x_i)$  is then the set of all possible distinct haplotypes extending from locus  $x_0$  to locus  $x_i$ . Let  $h_i$  in  $\mathcal{C}(x_i)$  be the  $i^{\text{th}}$  most frequent haplotype. We then calculate  $EHH12$  of the entire sample of haplotypes from  $x_0$  to  $x_i$  as

$$EHH12(x_i) = \frac{\binom{n_{h_1} + n_{h_2}}{2}}{\binom{n}{2}} + \sum_{j>2}^{|\mathcal{C}(x_i)|} \frac{\binom{n_{h_j}}{2}}{\binom{n}{2}}$$

where  $n_{h_j}$  is the number of  $h_j$  haplotypes in the sample.

If  $EHH12(x_i)$  is calculated repeatedly for several  $x_i$  moving farther away from  $x_0$ , we expect to observe more haplotypes and therefore we expect to observe lower haplotype homozygosity. However, the decay of homozygosity is slower in a region under selection [2–4]. Therefore, we integrate the decay of  $EHH12$  as a function of genetic distance in order to summarize the pattern and make genome-wide comparisons. This integrated score is calculated as

$$iHH12 = \sum_{i=1}^{|\mathcal{D}|} \frac{1}{2} (EHH12(x_{i-1}) - EHH(x_i)) g(x_{i-1}, x_i) + \sum_{i=1}^{|\mathcal{U}|} \frac{1}{2} (EHH12(x_{i-1}) - EHH(x_i)) g(x_{i-1}, x_i)$$

where  $g(x_{i-1}, x_i)$  is the genetic distance between markers  $x_{i-1}$  and  $x_i$ .  $\mathcal{D}$  and  $\mathcal{U}$  represent sets of markers downstream and upstream from  $x_0$ , respectively. In practice the curve is integrated until  $EHH12 < 0.05$  on both sides of the focal locus. Finally,  $iHH12$  is normalized genome-wide in order to account for the effects of demographic history on the distribution of haplotype homozygosity. We integrated this new statistical framework to detect soft-sweeps into `selscan` version 1.2.0 (<https://github.com/szpiech/selscan>) [5].

We evaluated the power of our  $iHH12$  statistic implementation in `selscan` to detect hard and soft sweeps relative to  $iHS$  across a range of parameters. We simulated neutrally evolving sequences with `ms` [6] and non-neutrally evolving sequences with `msse1`, a modified version of `ms` also developed by R. Hudson

that conditions on an allele frequency trajectory. We simulated trajectories backwards in time under a selection on standing variation model with  $s = 0.01$ . Once an adaptive variant reached a set frequency backwards in time, the selection coefficient was set to  $s = 0$  and was allowed drift neutrally until loss. We simulated 200 replicates across several sampling frequencies (0.7, 0.8, 0.9), several frequencies at which the variant become adaptive (0, 0.01, 0.02, 0.05, 0.10), and several demographic histories (Constant, African, European; [7]).

For both *iHS* and *iHH12* scans, we normalized scores with respect to the neutral simulations and calculated the critical threshold for the most extreme 1% of scores. Using non-overlapping 100 kb windows across the genome, we calculated the fraction of scores in each window above this threshold. The top 1% of windows are identified as putatively under positive selection. This scheme controls the false positive rate to be no greater than 1%.

*iHH12* has good power to detect hard and soft sweeps (Appendix Fig A1 A, C, E) and has improved power to identify both types of sweeps over *iHS* (Appendix Fig A1 B, D, F), particularly under realistic models of human demography.

### Computing *iHS* and *iHH12* scores in the Thousand Genomes Project (TGP)

We used `selscan` to compute both *iHS* and *iHH12* scores for phase 3 TGP [8] phased whole genome sequences with a genetic map from HapMap3 [9]. Genetic map locations for sites not present in HapMap3 were linearly interpolated. The statistics were calculated for each population separately, and variants of frequency  $< 0.05$  were filtered by `selscan`. All `selscan` runs used default parameters.

Using `selscan`'s companion program `norm`, for each population we normalized *iHH12* scores genome-wide and normalized *iHS* scores in 1% frequency bins genome-wide. We identified the critical threshold representing the most extreme 1% of scores for each statistic. Then, to identify putative regions under selection, we partitioned the genome into non-overlapping 100 kb windows, and then we calculated the fraction of scores in each window above this threshold. The top 1% of windows were identified as putatively under positive selection. This scheme controlled the false positive rate to be no greater than 1%.

## Appendix Figure A1

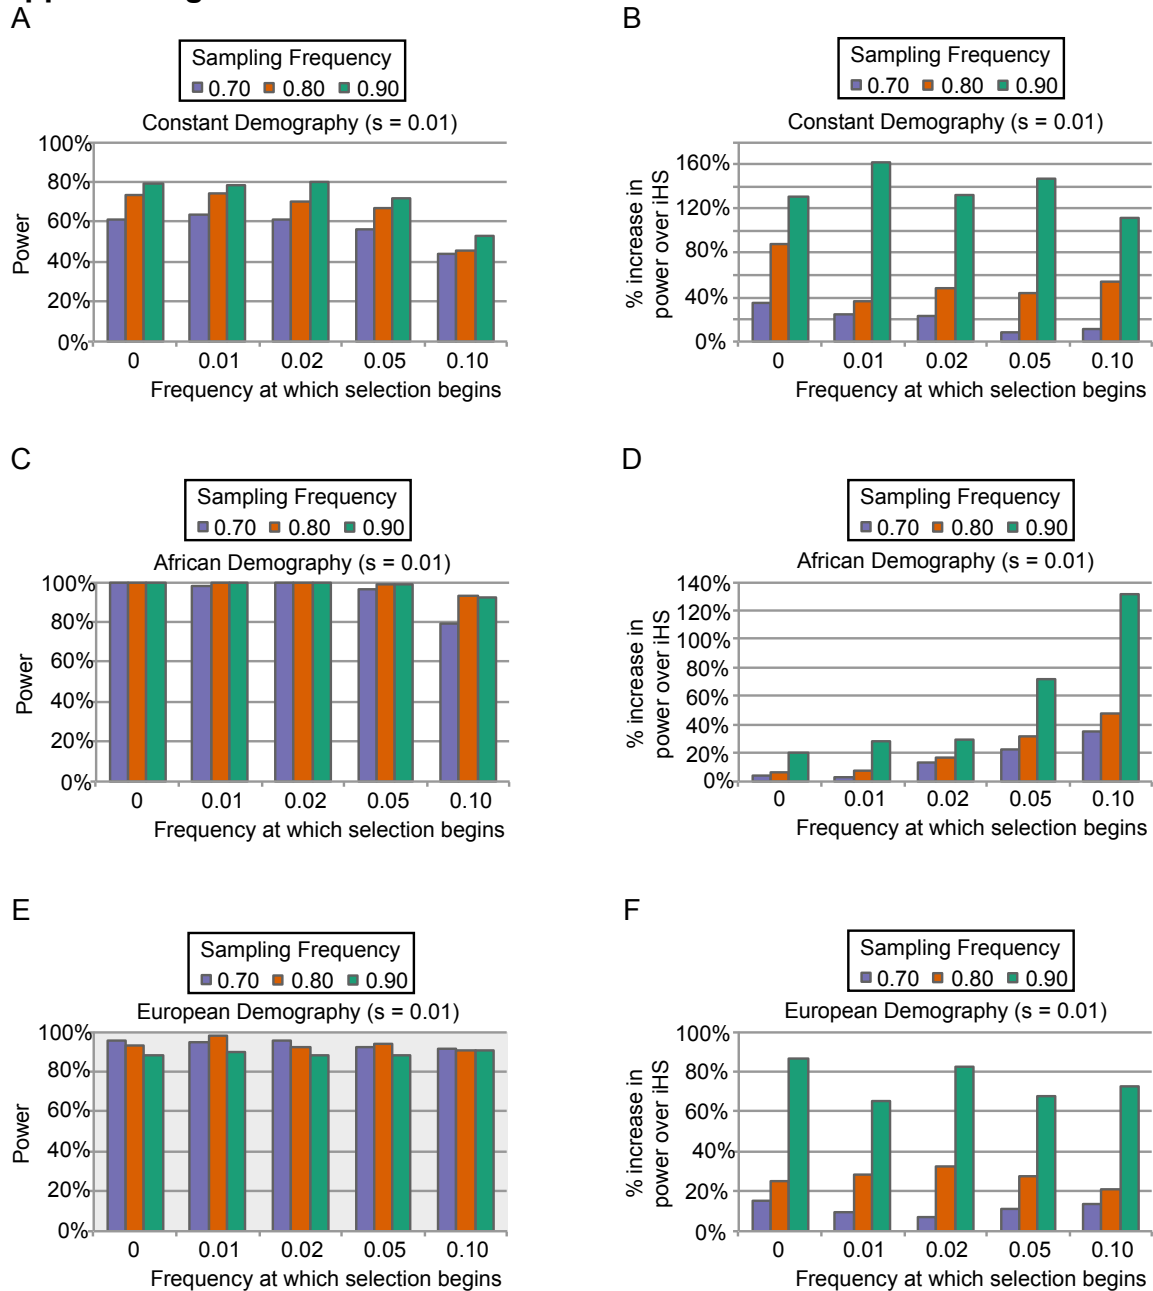

**Appendix Fig A1. Power of *iHH12* and comparison with *iHS*.** Simulated power of *iHH12* (A), (C), and (E) under varying parameters and comparison with *iHS* power (B), (D), and (F) in the same scenario. Panels (A) and (B) show results for a constant demography; panels (C) and (D) show results for an African demography; and panels (E) and (F) show results for a European demography. Non-constant demographies are from Gutenkunst et al. [7]. When the frequency at which selection begins is  $> 0$ , the sweep is considered soft. All simulations assume a selection coefficient of  $s = 0.01$ .

## References

1. Garud NR, Messer PW, Buzbas EO, Petrov DA. Recent selective sweeps in North American *Drosophila melanogaster* show signatures of soft sweeps. Copenhaver GP, editor. *PLoS Genet.* Wiley; 2015;11: e1005004. doi:10.1371/journal.pgen.1005004
2. Sabeti PC, Reich DE, Higgins JM, Levine HZP, Richter DJ, Schaffner SF, et al. Detecting recent positive selection in the human genome from haplotype structure. *Nature.* Nature Publishing Group; 2002;419: 832–837. doi:10.1038/nature01027.1.
3. Voight BF, Kudaravalli S, Wen X, Pritchard JK. A map of recent positive selection in the human genome. Hurst L, editor. *PLoS Biol.* Public Library of Science; 2006;4: 0446–0458. doi:10.1371/journal.pbio.0040072
4. Sabeti PC, Varilly P, Fry B, Lohmueller J, Hostetter E, Cotsapas C, et al. Genome-wide detection and characterization of positive selection in human populations. *Nature.* Nature Publishing Group; 2007;449: 913–8. doi:10.1038/nature06250
5. Szpiech ZA, Hernandez RD. Selscan: An efficient multithreaded program to perform EHH-based scans for positive selection. *Mol Biol Evol.* 2014;31: 2824–2827. doi:10.1093/molbev/msu211
6. Hudson RR. Generating samples under a Wright-Fisher neutral model of genetic variation. *Bioinformatics.* Oxford University Press; 2002;18: 337–338. doi:10.1093/bioinformatics/18.2.337
7. Gutenkunst RN, Hernandez RD, Williamson SH, Bustamante CD. Inferring the joint demographic history of multiple populations from multidimensional SNP frequency data. *PLoS Genet.* 2009;5: e1000695. doi:10.1371/journal.pgen.1000695
8. Auton A, Abecasis GR, Altshuler DM, Durbin RM, Abecasis GR, Bentley DR, et al. A global reference for human genetic variation. *Nature.* 2015;526: 68–74. doi:10.1038/nature15393
9. The International HapMap 3 Consortium, Altshuler DM, Gibbs RA, Peltonen L, Dermitzakis E, Schaffner SF, et al. Integrating common and rare genetic variation in diverse human populations. *Nature.* 2010;467: 52–8. doi:10.1038/nature09298
